# Supplementary material
Source: PubMed Central journal article supplement (PMC3293652)
Supplement: NIHMS354786-supplement-1_si_001.pdf [file NIHMS354786-supplement-1_si_001.pdf]

# SUPPORTING INFORMATION

## Measurement and Theory of Hydrogen Bonding Contribution to Isosteric DNA Base Pairs

*Omid Khakshoor, Steven E. Wheeler<sup>§\*</sup>, K. N. Houk<sup>†</sup> and Eric T. Kool<sup>\*</sup>*

Department of Chemistry, Stanford University, Stanford, CA 94305.

<sup>†</sup>Department of Chemistry and Biochemistry, University of California, Los Angeles, CA 90095.

<sup>§</sup>Department of Chemistry, Texas A&M University, College Station, TX 77843.

\*email addresses: wheeler@chem.tamu.edu; kool@stanford.edu

### Table of Contents

|                                                                                                |     |
|------------------------------------------------------------------------------------------------|-----|
| <b>Synthesis of modified DNAs</b>                                                              | S2  |
| <b>Table S1.</b> MALDI-MS data for modified DNAs                                               | S3  |
| <b>Fig. S1.</b> Representative melting curves of modified DNA duplexes                         | S4  |
| <b>Fig. S2.</b> Van't Hoff plots for the modified DNA duplexes                                 | S9  |
| <b>Table S2.</b> Thermodynamic parameters for heterodimers obtained by thermal melting studies | S14 |
| <b>Table S3.</b> ITC concentrations and association constants for the modified DNA duplexes    | S15 |
| <b>Fig. S3.</b> Representative ITC curves for the modified DNA duplexes (25 °C)                | S16 |
| <b>Estimation of <math>\Delta G_{itc}^{\circ}</math> for AT•AT and T•A duplexes</b>            | S17 |
| <b>Fig. S4.</b> Correlation plots of $T_m$ vs $\Delta G_{melt25}$ and $\Delta G_{melt37}$      | S19 |
| <b>Fig. S5.</b> Plots of $\Delta G_{melt37}$ vs $\Delta G_{itc25}$                             | S20 |
| <b>Full citation for Gaussian09</b>                                                            | S21 |
| <b>Fig. S6.</b> Optimized structures for pairs in this study                                   | S22 |
| <b>Table S4.</b> Absolute energies                                                             | S23 |
| <b>Cartesian coordinates</b>                                                                   | S24 |

### Synthesis of DNA oligonucleotides.

Phosphoramidite derivatives of 2,4-dichloro-5-toluene-1- $\beta$ -D-deoxyriboside (dL) and 2,3-dichloro-5-toluene-1- $\beta$ -D-deoxyriboside ( $d^{23}$ L) were prepared as previously described.<sup>1,2</sup> The Phosphoramidite derivative of 2,4-difluoro-5-toluene-1- $\beta$ -D-deoxyriboside (dF) was obtained from Glen Research.

DNA oligonucleotides were synthesized on an Applied Biosystems 394 synthesizer using standard  $\beta$ -cyanoethylphosphoramidite chemistry. Oligonucleotides were synthesized in DMT-on mode and were cleaved and deprotected in concentrated  $\text{NH}_4\text{OH}$  at 55°C for overnight. The oligonucleotides were semi-purified and DMT-deprotected by Poly-Pack II column (Glen Research) and were further purified using reverse phase HPLC ( $\text{C}_{18}$  column 22 x 250 mm; solvent A: 0.1 M aq. triethylammonium acetate (pH 8), solvent B: acetonitrile; Gradient 0–30% solvent B.) Oligonucleotides were all characterized by MALDI-TOF mass spectrometry.

The oligonucleotides were quantified by measuring absorbance at 260 nm at 90 °C. The corresponding molar extinction coefficients were calculated by summing up the individual extinction coefficients for all the bases in the sequence. The molar extinction coefficients for dA, dG, dT, dC, dF, dL, and  $d^{23}$ L were taken as 15400, 11500, 8700, 7400, 1200, 250, and 250,  $\text{M}^{-1}\cdot\text{cm}^{-1}$  at 260 nm, respectively.

---

<sup>1</sup> Kim, T. W.; Kool, E. T. *J. Org. Chem.* **2005**, *70*, 2048–2053.

<sup>2</sup> Sintim, H. O.; Kool, E. T. *Angew. Chem. Int. Ed.* **2006**, *45*, 1974–1979.

**Table S1.** MALDI-MS data for modified DNAs.

| <b>Oligonucleotide</b>            | <b>Mass (Calc.)</b> | <b>Mass (found)</b> |
|-----------------------------------|---------------------|---------------------|
| 5'-TGTATTCGTGCG                   | 3667.4              | 3666.4              |
| 5'-TGTATFCGTGCG                   | 3669.4              | 3669.7              |
| 5'-TGTATLCGTGCG                   | 3701.3              | 3700.5              |
| 5'-TGTAT <sup>23</sup> LCGTGCG    | 3701.3              | 3700.7              |
| 5'-CGCACGAATACA                   | 3623.4              | 3624.1              |
| 5'-CGCACGGATACA                   | 3639.4              | 3640.2              |
| 5'-CGCACGTATACA                   | 3614.4              | 3614.1              |
| 5'-CGCACGCATACA                   | 3599.4              | 3601.0              |
| 5'-GGTGGAAATTCGGAG                | 4383.9              | 4383.2              |
| 5'-GGTGGAAATFCGGAG                | 4385.9              | 4385.2              |
| 5'-GGTGGAAATLCGGAG                | 4417.8              | 4418.2              |
| 5'-GGTGGAAAT <sup>23</sup> LCGGAG | 4417.8              | 4417.3              |
| 5'-GGTGGGATTCGGAG                 | 4399.9              | 4399.7              |
| 5'-GGTGGGATFCGGAG                 | 4401.9              | 4400.7              |
| 5'-GGTGGGATLCGGAG                 | 4433.8              | 4435.5              |
| 5'-GGTGGGAT <sup>23</sup> LCGGAG  | 4433.8              | 4431.5              |
| 5'-GGTGGTATTCGGAG                 | 4374.9              | 4374.2              |
| 5'-GGTGGTATFCGGAG                 | 4376.9              | 4375.1              |
| 5'-GGTGGTATLCGGAG                 | 4408.8              | 4408.8              |
| 5'-GGTGGTAT <sup>23</sup> LCGGAG  | 4408.8              | 4408.6              |
| 5'-GGTGGCATTCGGAG                 | 4359.9              | 4360.0              |
| 5'-GGTGGCATFCGGAG                 | 4361.9              | 4361.7              |
| 5'-GGTGGCATLCGGAG                 | 4393.8              | 4396.5              |
| 5'-GGTGGCAT <sup>23</sup> LCGGAG  | 4393.8              | 4391.5              |
| 5'-CTCCGAATTCACC                  | 4143.7              | 4143.0              |
| 5'-CTCCGAATFCCACC                 | 4145.7              | 4145.8              |
| 5'-CTCCGAATLCCACC                 | 4177.6              | 4178.7              |
| 5'-CTCCGAAT <sup>23</sup> LCCACC  | 4177.6              | 4177.9              |
| 5'-CTCCGGATTCACC                  | 4159.7              | 4158.2              |
| 5'-CTCCGGATFCCACC                 | 4161.7              | 4161.5              |
| 5'-CTCCGGATLCCACC                 | 4193.6              | 4193.0              |
| 5'-CTCCGGAT <sup>23</sup> LCCACC  | 4193.6              | 4193.9              |
| 5'-CTCCGTATTCACC                  | 4134.7              | 4133.8              |
| 5'-CTCCGTATFCCACC                 | 4136.7              | 4135.4              |
| 5'-CTCCGTATLCCACC                 | 4168.6              | 4168.4              |
| 5'-CTCCGTAT <sup>23</sup> LCCACC  | 4168.6              | 4169.6              |
| 5'-CTCCGCATTCACC                  | 4119.7              | 4119.0              |
| 5'-CTCCGCATFCCACC                 | 4121.7              | 4121.2              |
| 5'-CTCCGCATLCCACC                 | 4153.6              | 4153.2              |
| 5'-CTCCGCAT <sup>23</sup> LCCACC  | 4153.6              | 4155.4              |
| 5'-CGCGCG                         | 1793.2              | 1792.8              |
| 5'-CGCGCGA                        | 2106.4              | 2106.0              |
| 5'-TCGCGCG                        | 2097.4              | 2097.2              |
| 5'-FCGCGCG                        | 2099.4              | 2100.3              |
| 5'-TCGCGCGA                       | 2410.6              | 2409.2              |
| 5'-FCGCGCGA                       | 2412.6              | 2413.9              |

**Fig. S1.** Representative melting curves obtained for DNA duplexes at 3  $\mu\text{M}$  total DNA concentration.

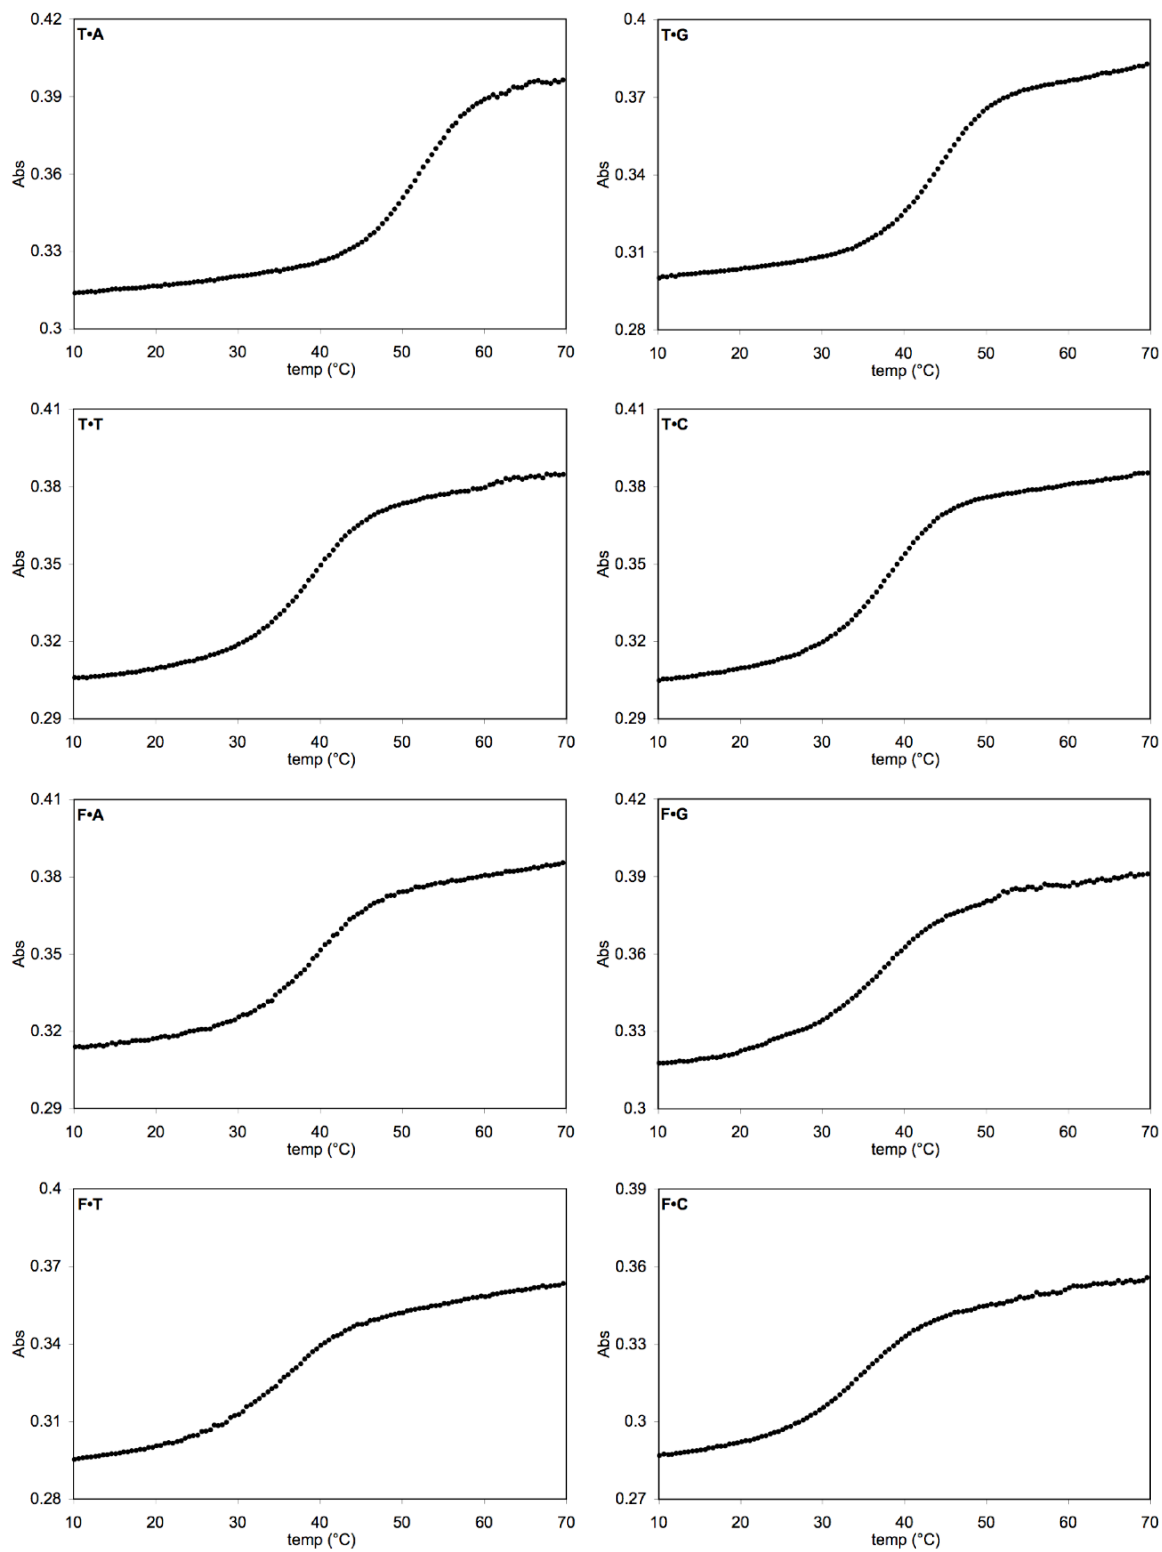

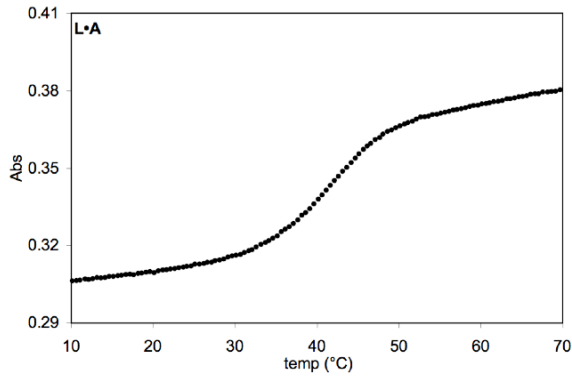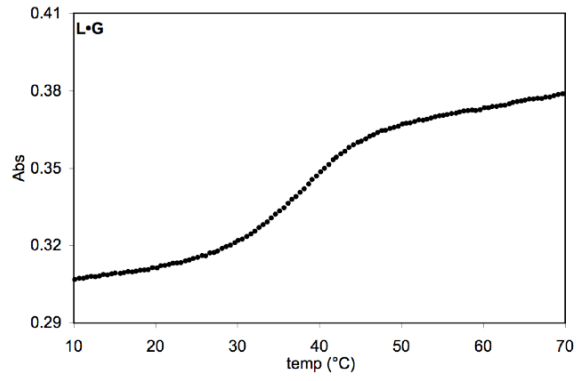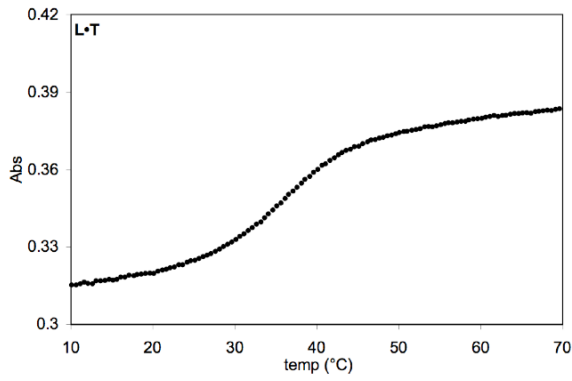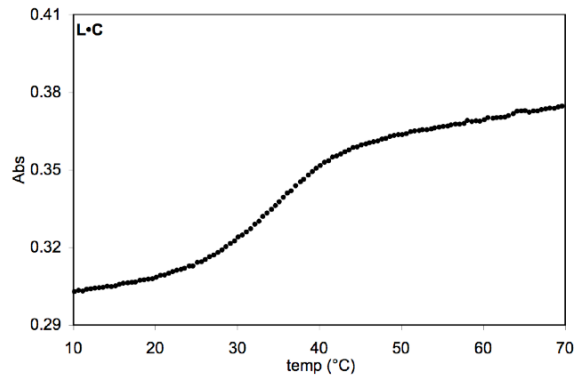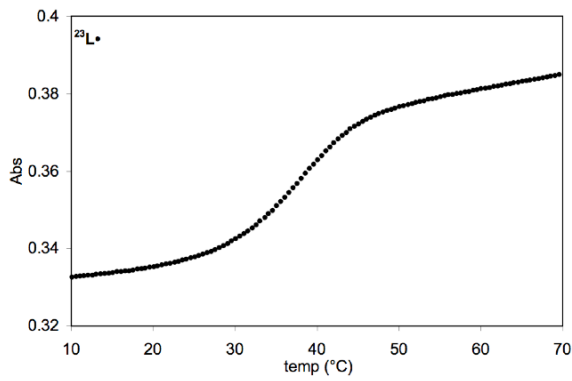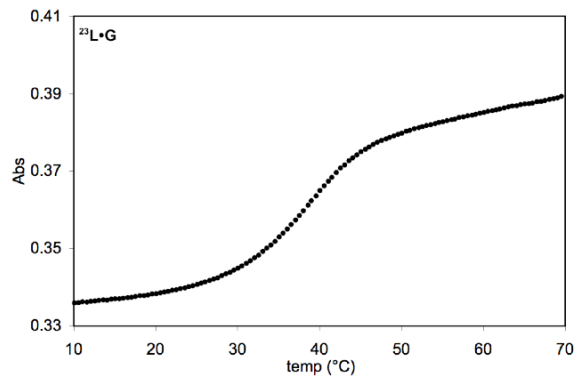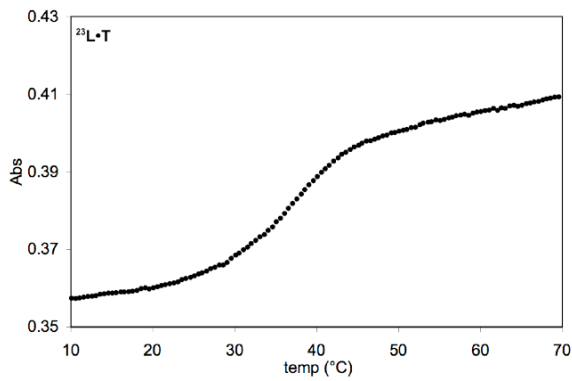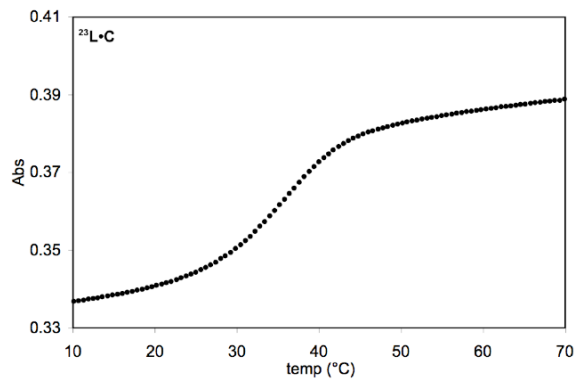

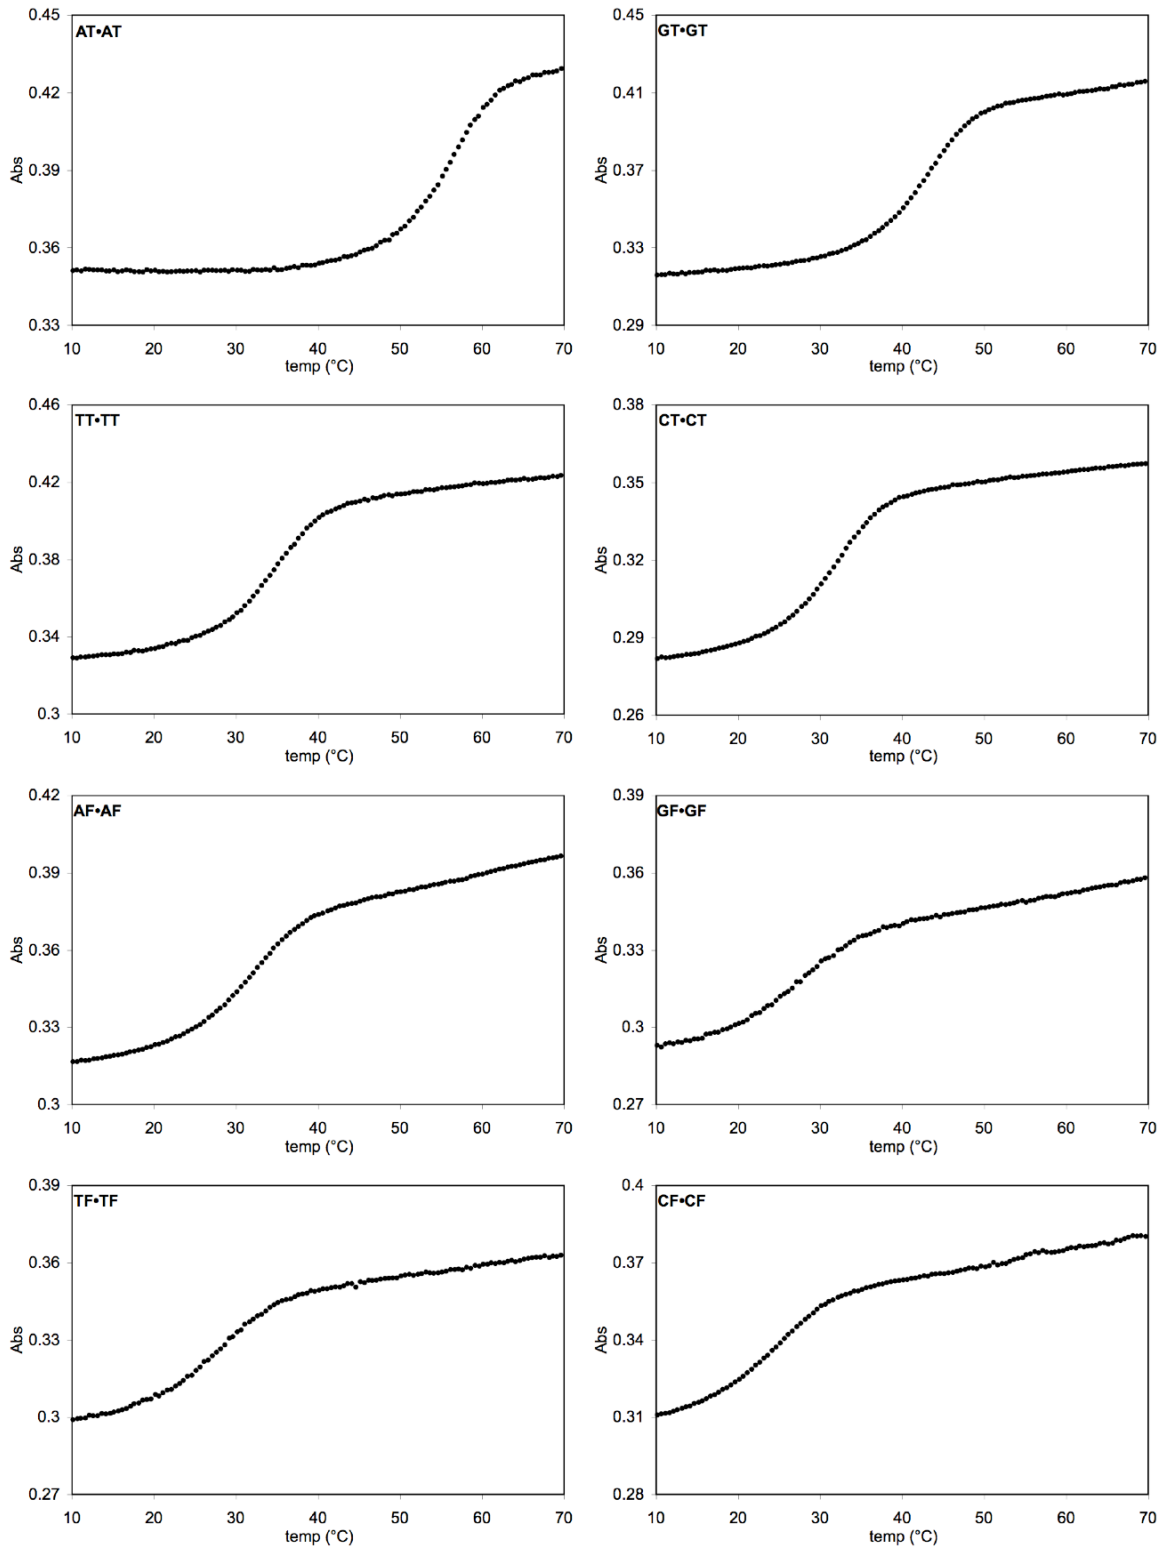

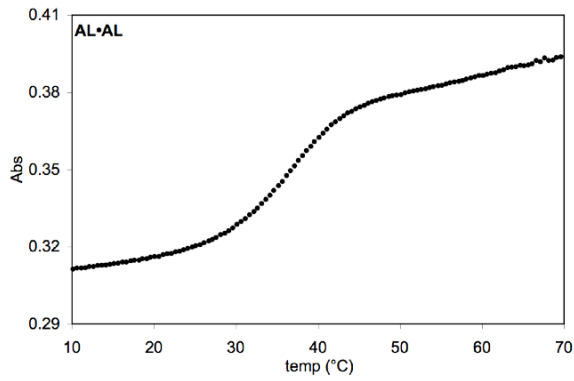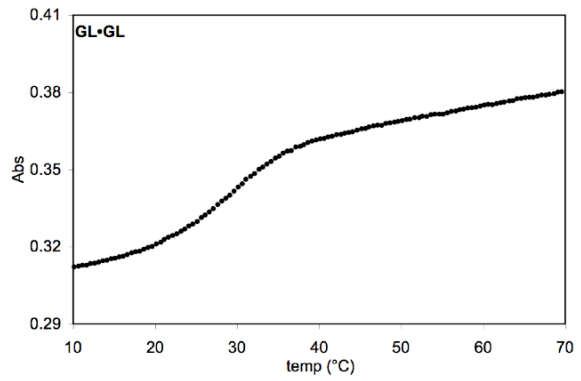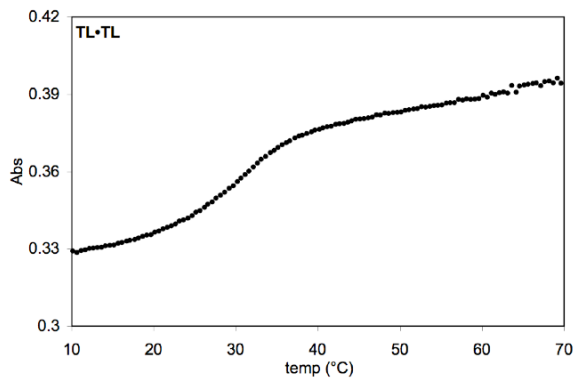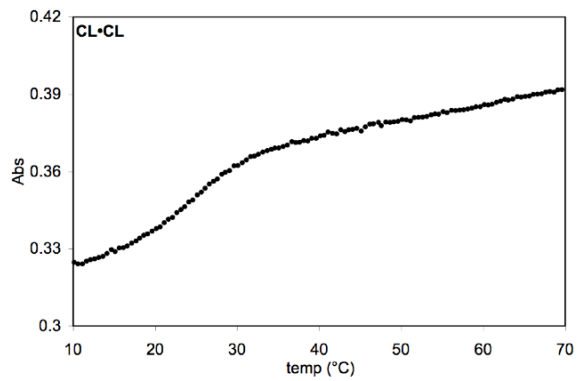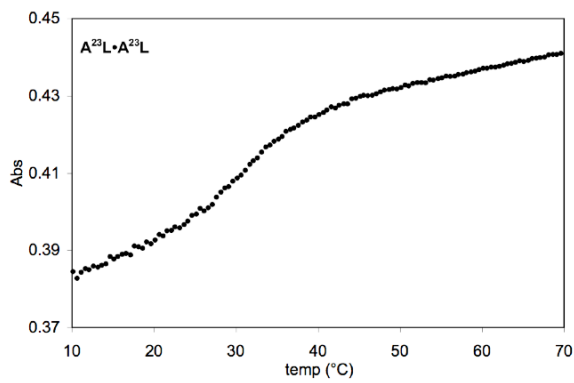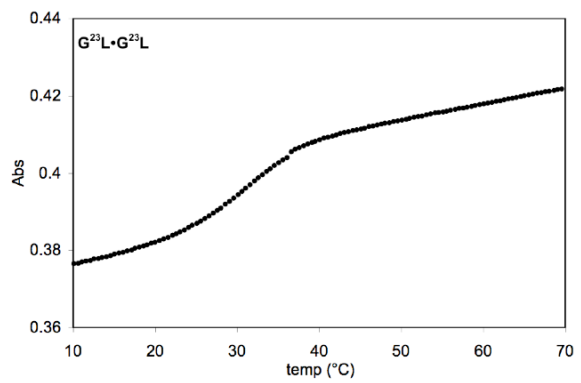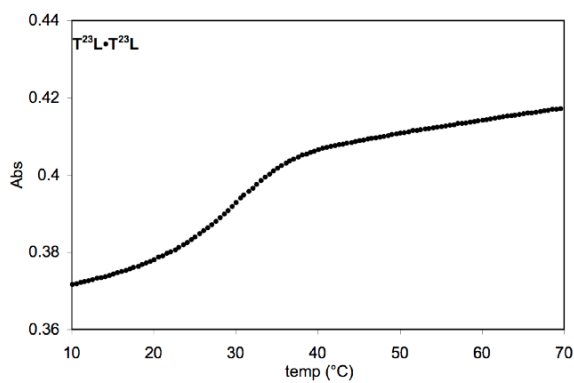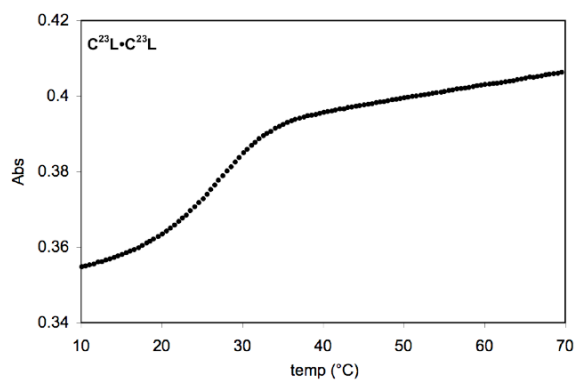

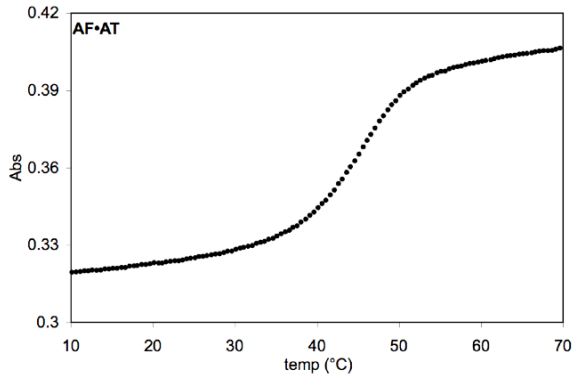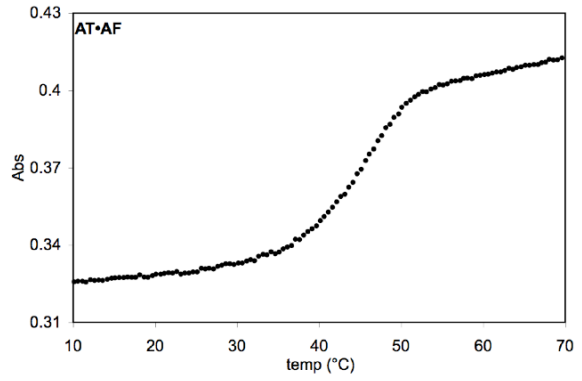

The following melting curves are obtained at 6  $\mu$ M for the self-complementary DNAs:

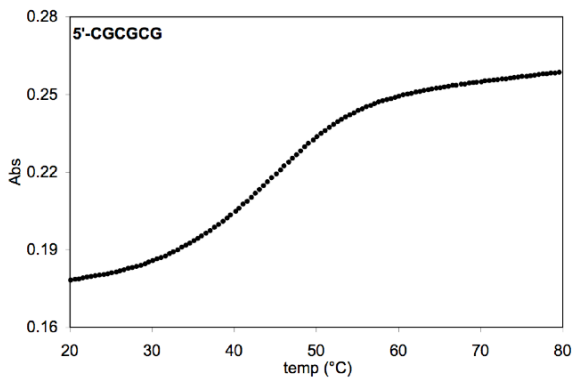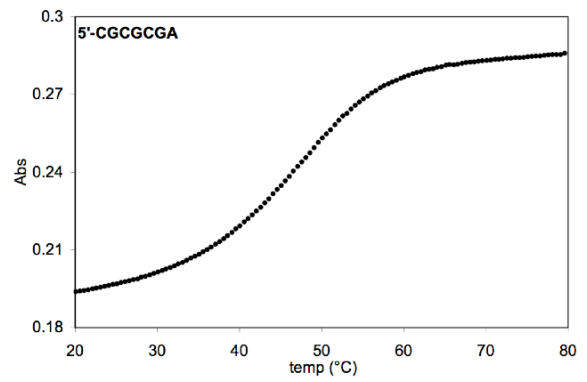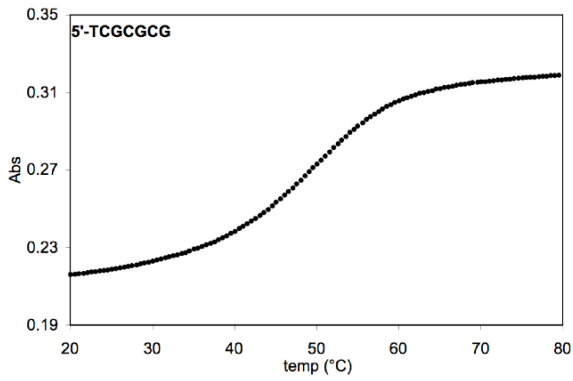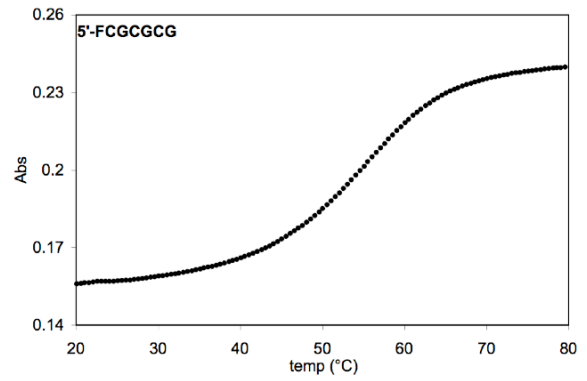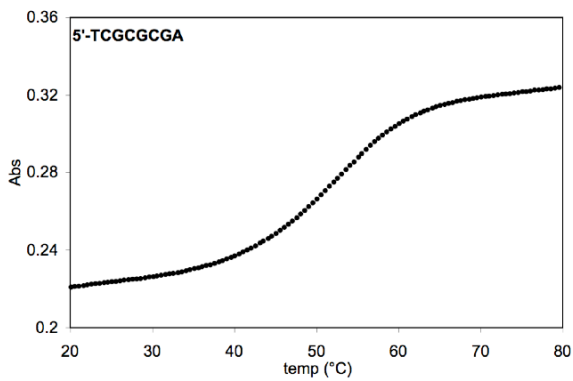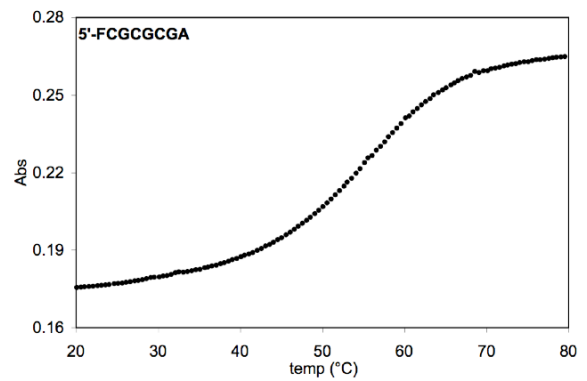



**Fig. S2.** Van't Hoff plots for the modified DNA duplexes.

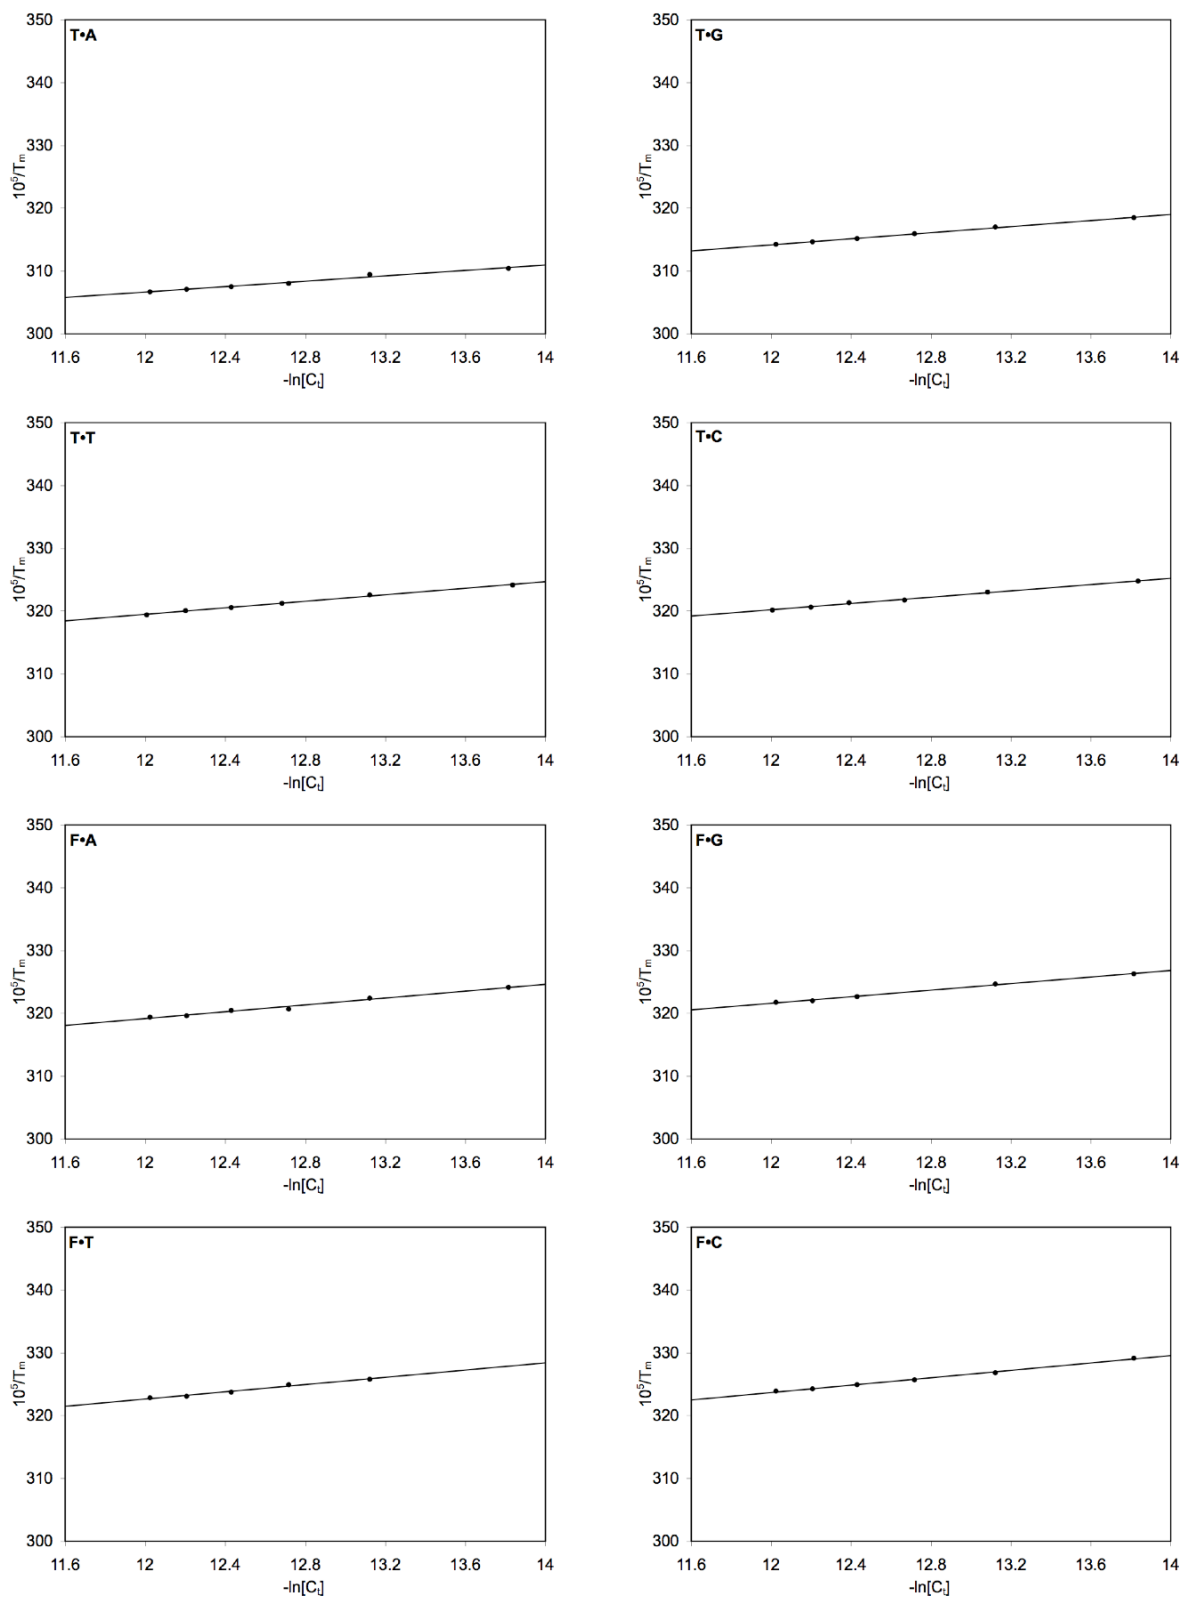

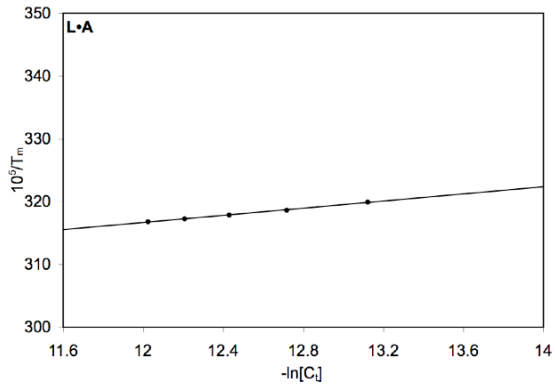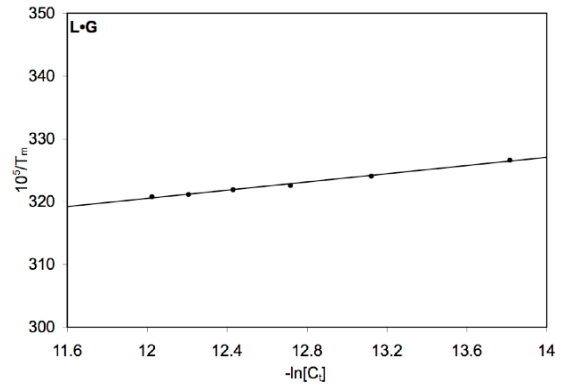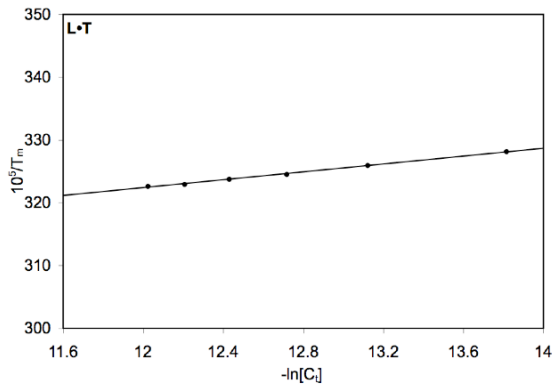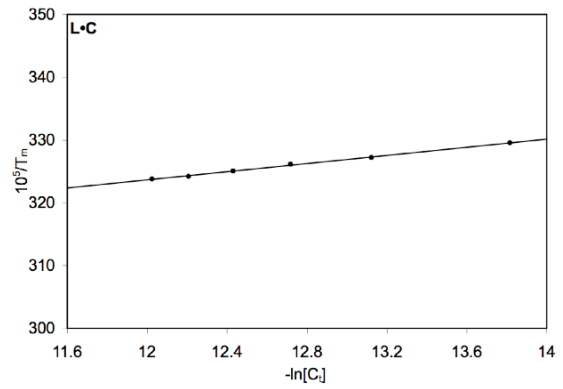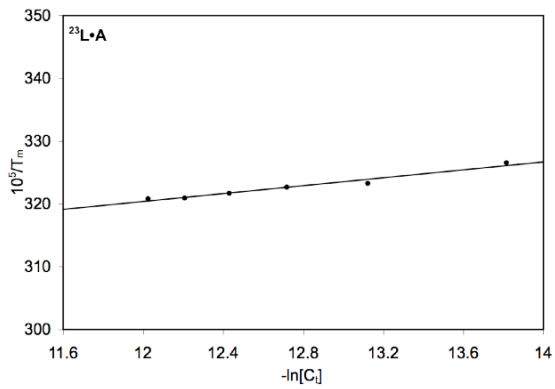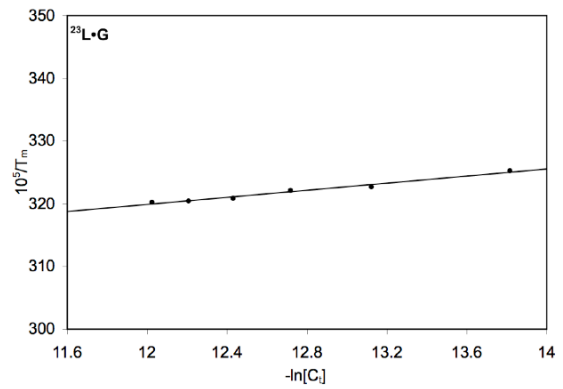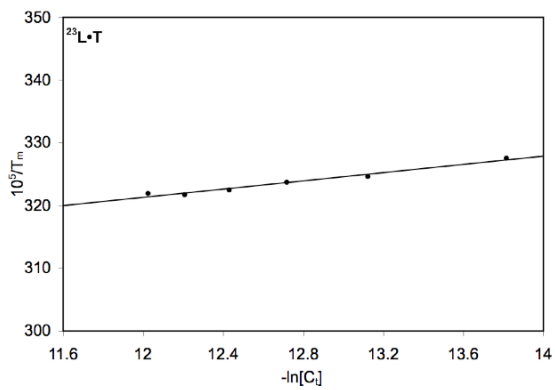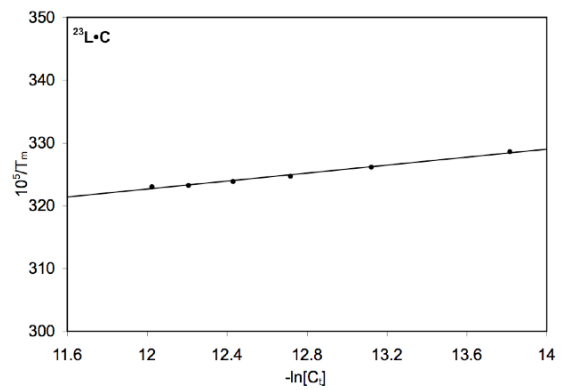

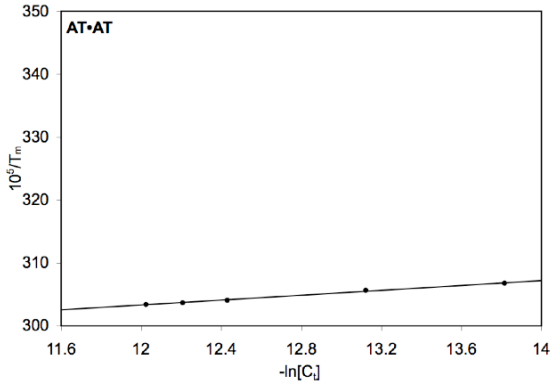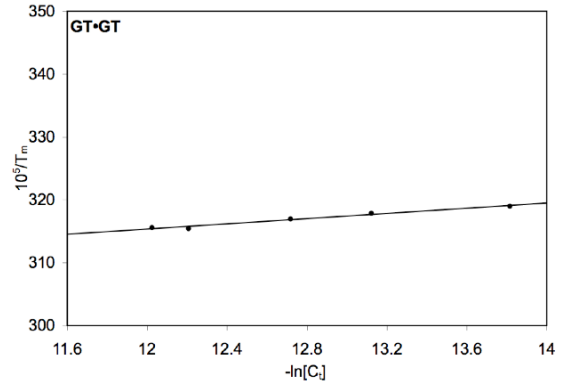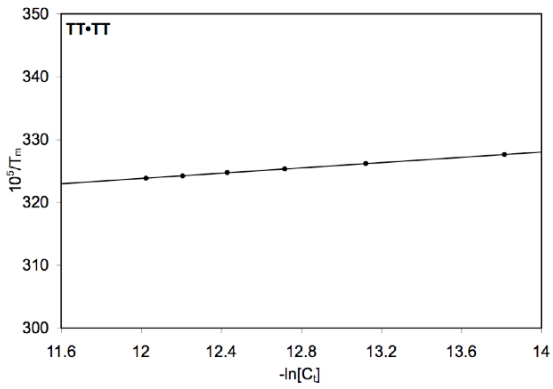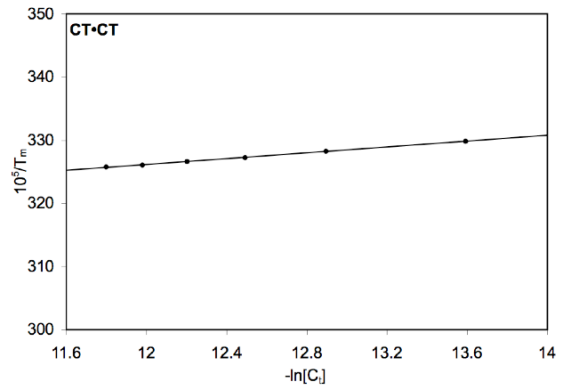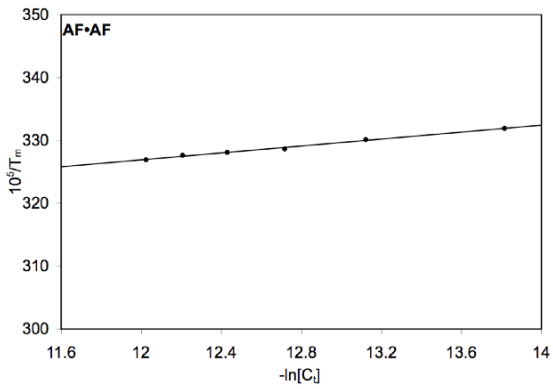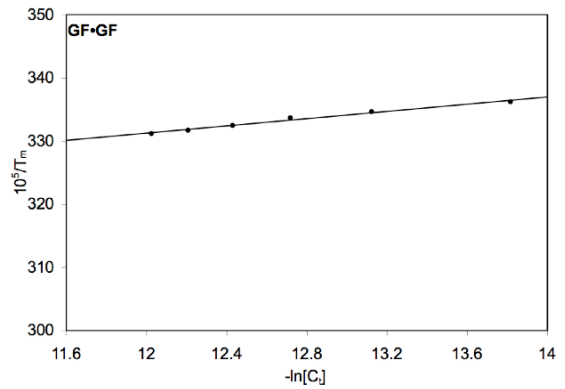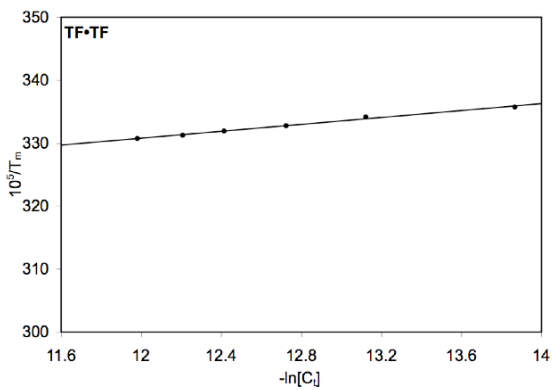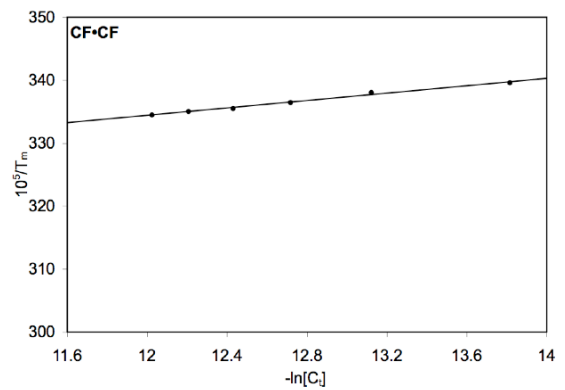

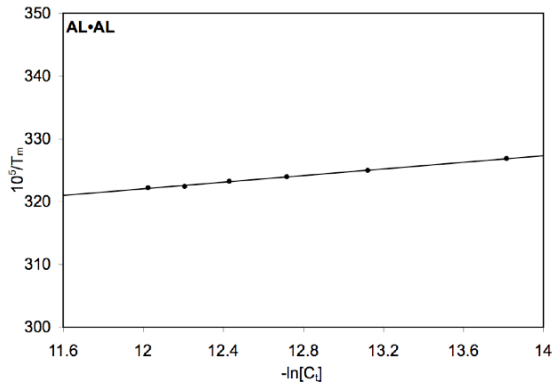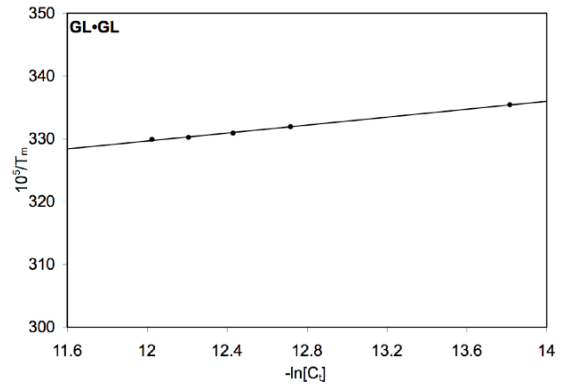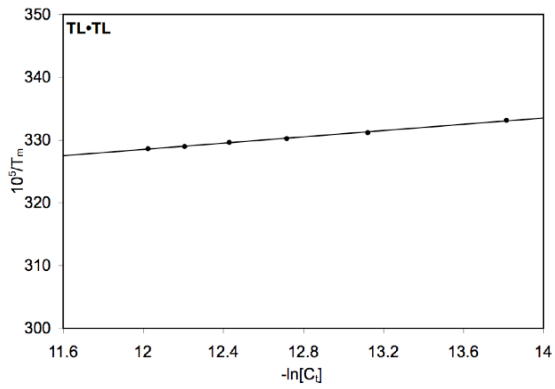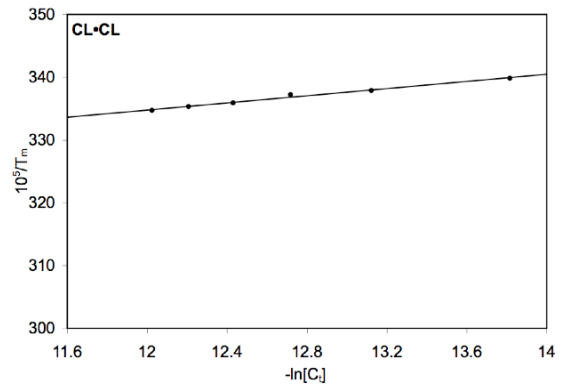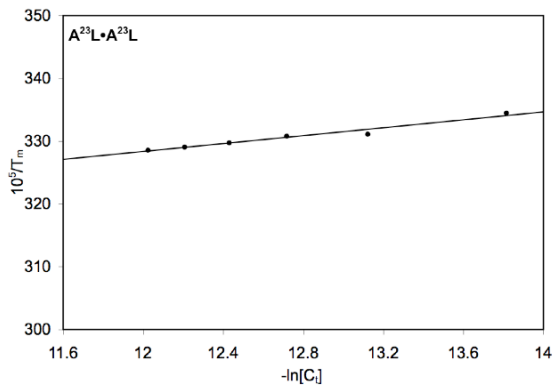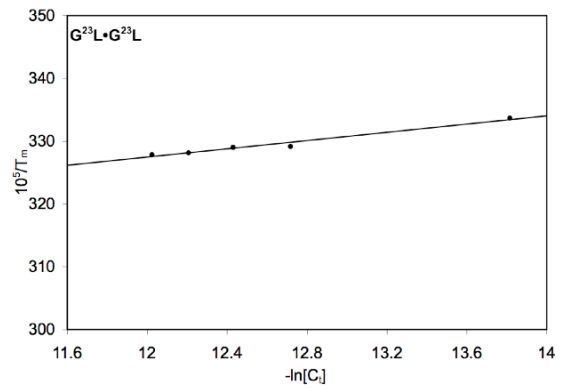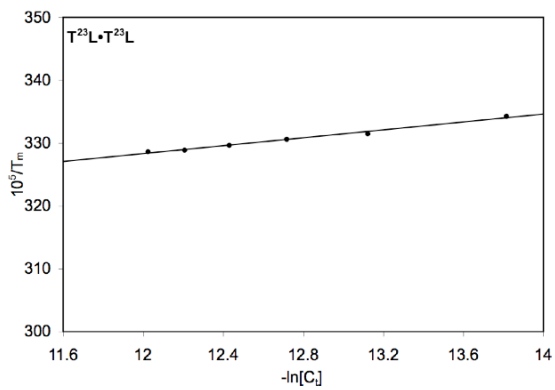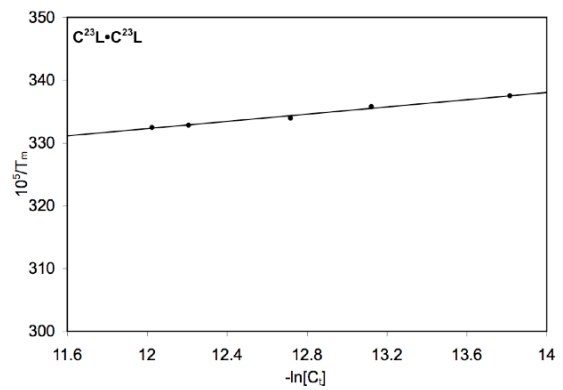

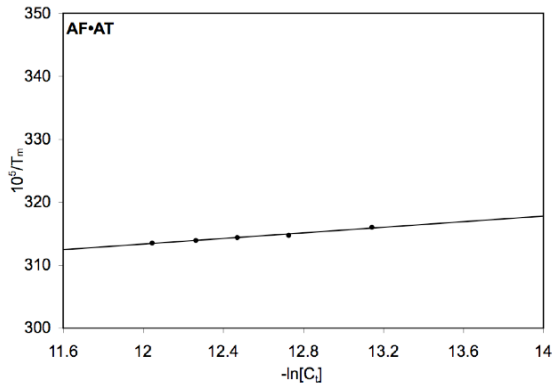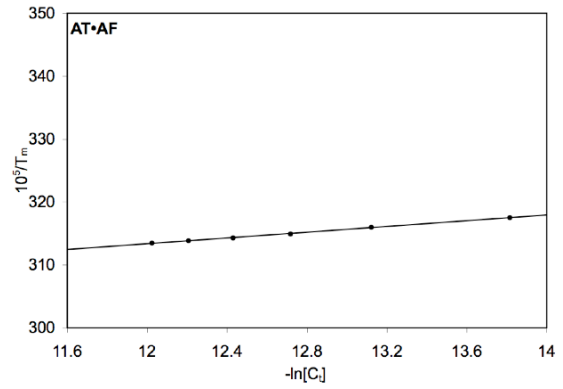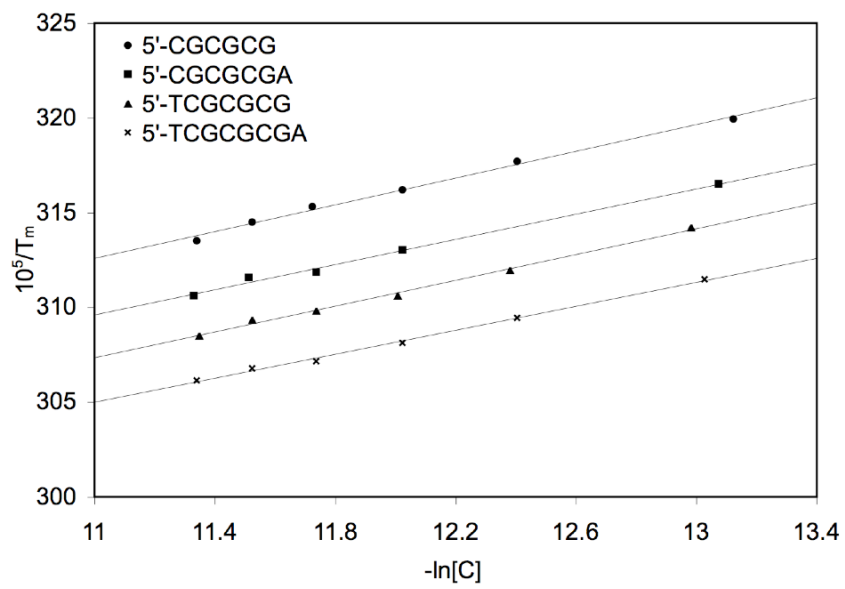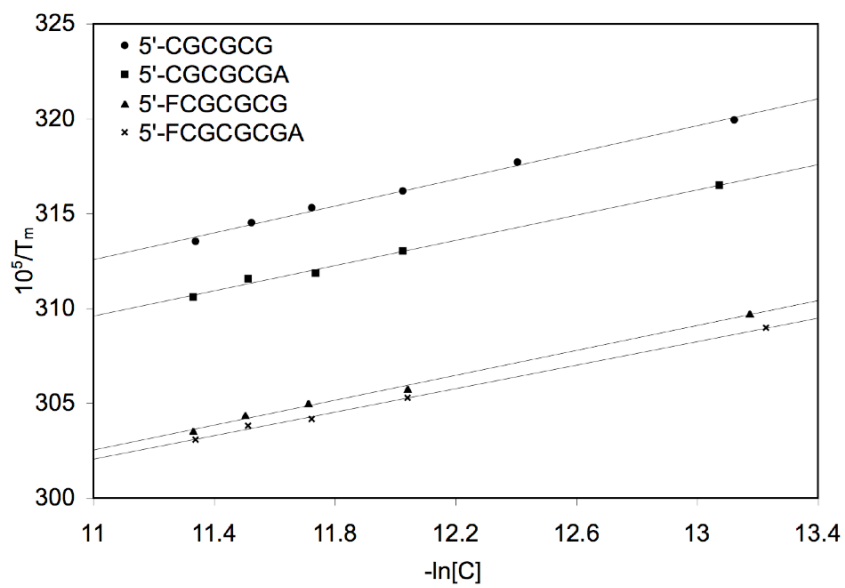

**Table S2.** Thermodynamic parameters for heterodimers obtained by thermal melting studies.

| DNA Duplex                          | $T_m$ @ 3 $\mu$ M (°C) | $\Delta H^\circ_{37,melt}$ (kcal/mol) | $\Delta S^\circ_{37,melt}$ (cal/k.mol) | $\Delta G^\circ_{37,melt}$ (kcal/mol) |
|-------------------------------------|------------------------|---------------------------------------|----------------------------------------|---------------------------------------|
| T•A                                 | 51.3                   | -94.60 ( $\pm$ 4.41)                  | -263.60 ( $\pm$ 13.60)                 | -12.85 ( $\pm$ 0.20)                  |
| T•G                                 | 43.4                   | -83.56 ( $\pm$ 2.19)                  | -235.94 ( $\pm$ 6.94)                  | -10.38 ( $\pm$ 0.04)                  |
| T•T                                 | 38.1                   | -76.46 ( $\pm$ 2.14)                  | -217.66 ( $\pm$ 6.85)                  | - 8.95 ( $\pm$ 0.02)                  |
| T•C                                 | 37.4                   | -79.38 ( $\pm$ 1.71)                  | -227.58 ( $\pm$ 5.52)                  | - 8.80 ( $\pm$ 0.02)                  |
| L•A                                 | 40.7                   | -73.04 ( $\pm$ 1.46)                  | -204.76 ( $\pm$ 4.65)                  | - 9.54 ( $\pm$ 0.03)                  |
| L•G                                 | 36.8                   | -63.61 ( $\pm$ 3.58)                  | -177.30 ( $\pm$ 11.53)                 | - 8.62 ( $\pm$ 0.03)                  |
| L•T                                 | 35.0                   | -62.70 ( $\pm$ 3.00)                  | -175.53 ( $\pm$ 9.82)                  | - 8.26 ( $\pm$ 0.05)                  |
| L•C                                 | 33.5                   | -62.79 ( $\pm$ 1.48)                  | -176.65 ( $\pm$ 4.80)                  | - 8.00 ( $\pm$ 0.02)                  |
| F•A                                 | 38.7                   | -73.17 ( $\pm$ 3.54)                  | -206.92 ( $\pm$ 11.32)                 | - 9.00 ( $\pm$ 0.07)                  |
| F•G                                 | 36.0                   | -72.34 ( $\pm$ 1.74)                  | -205.97 ( $\pm$ 5.64)                  | - 8.46 ( $\pm$ 0.03)                  |
| F•T                                 | 34.6                   | -66.92 ( $\pm$ 3.97)                  | -189.30 ( $\pm$ 12.86)                 | - 8.22 ( $\pm$ 0.07)                  |
| F•C                                 | 33.9                   | -67.29 ( $\pm$ 2.83)                  | -191.22 ( $\pm$ 9.30)                  | - 7.98 ( $\pm$ 0.06)                  |
| <sup>23</sup> L•A                   | 36.8                   | -66.74 ( $\pm$ 4.46)                  | -187.33 ( $\pm$ 14.41)                 | - 8.64 ( $\pm$ 0.13)                  |
| <sup>23</sup> L•G                   | 37.3                   | -72.27 ( $\pm$ 4.62)                  | -204.66 ( $\pm$ 15.01)                 | - 8.80 ( $\pm$ 0.09)                  |
| <sup>23</sup> L•T                   | 35.8                   | -62.78 ( $\pm$ 5.40)                  | -175.16 ( $\pm$ 17.50)                 | - 8.46 ( $\pm$ 0.10)                  |
| <sup>23</sup> L•C                   | 34.8                   | -64.92 ( $\pm$ 2.98)                  | -182.89 ( $\pm$ 9.65)                  | - 8.20 ( $\pm$ 0.04)                  |
| AT•AT                               | 55.0                   | -99.87 ( $\pm$ 2.85)                  | -276.28 ( $\pm$ 8.69)                  | -14.18 ( $\pm$ 0.16)                  |
| GT•G T                              | 42.4                   | -94.26 ( $\pm$ 6.18)                  | -270.62 ( $\pm$ 19.55)                 | -10.32 ( $\pm$ 0.15)                  |
| TT•TT                               | 34.2                   | -91.23 ( $\pm$ 1.96)                  | -268.76 ( $\pm$ 6.39)                  | - 7.87 ( $\pm$ 0.03)                  |
| CT•CT                               | 31.9                   | -84.90 ( $\pm$ 1.72)                  | -250.26 ( $\pm$ 5.68)                  | - 7.28 ( $\pm$ 0.04)                  |
| AL•AL                               | 35.6                   | -75.82 ( $\pm$ 2.36)                  | -217.57 ( $\pm$ 7.64)                  | - 8.34 ( $\pm$ 0.02)                  |
| GL•G L                              | 29.2                   | -63.50 ( $\pm$ 2.38)                  | -182.74 ( $\pm$ 7.90)                  | - 6.82 ( $\pm$ 0.07)                  |
| TL•TL                               | 29.7                   | -76.74 ( $\pm$ 1.89)                  | -225.42 ( $\pm$ 6.22)                  | - 6.82 ( $\pm$ 0.04)                  |
| CL•CL                               | 23.4                   | -67.14 ( $\pm$ 3.00)                  | -198.09 ( $\pm$ 10.06)                 | - 5.70 ( $\pm$ 0.14)                  |
| AF•AF                               | 30.9                   | -73.60 ( $\pm$ 2.58)                  | -214.02 ( $\pm$ 8.43)                  | - 7.22 ( $\pm$ 0.04)                  |
| GF•G F                              | 26.8                   | -69.24 ( $\pm$ 3.22)                  | -202.80 ( $\pm$ 10.69)                 | - 6.35 ( $\pm$ 0.11)                  |
| TF•TF                               | 27.3                   | -72.68 ( $\pm$ 3.15)                  | -213.85 ( $\pm$ 10.47)                 | - 6.36 ( $\pm$ 0.10)                  |
| CF•CF                               | 24.0                   | -68.34 ( $\pm$ 3.09)                  | -201.94 ( $\pm$ 10.94)                 | - 5.70 ( $\pm$ 0.13)                  |
| A <sup>23</sup> L•A <sup>23</sup> L | 29.1                   | -64.93 ( $\pm$ 5.06)                  | -186.63 ( $\pm$ 16.76)                 | - 7.04 ( $\pm$ 0.19)                  |
| G <sup>23</sup> L•G <sup>23</sup> L | 30.6                   | -62.91 ( $\pm$ 5.06)                  | -179.43 ( $\pm$ 16.64)                 | - 7.26 ( $\pm$ 0.17)                  |
| T <sup>23</sup> L•T <sup>23</sup> L | 29.3                   | -66.64 ( $\pm$ 3.79)                  | -192.28 ( $\pm$ 12.21)                 | - 7.01 ( $\pm$ 0.10)                  |
| C <sup>23</sup> L•C <sup>23</sup> L | 26.3                   | -68.73 ( $\pm$ 3.52)                  | -201.76 ( $\pm$ 11.75)                 | - 6.16 ( $\pm$ 0.13)                  |

**Table S3.** ITC concentrations and association constants obtained for the modified DNA duplexes

| DNA Duplex | C <sub>s</sub><br>( $\mu\text{M}$ ) | C <sub>c</sub><br>( $\mu\text{M}$ ) | C <sub>s</sub> /C <sub>c</sub> | K <sub>a</sub><br>(M <sup>-1</sup> )          | C <sub>c</sub> •K <sub>a</sub> |
|------------|-------------------------------------|-------------------------------------|--------------------------------|-----------------------------------------------|--------------------------------|
| T•A        | 30.1                                | 2.2                                 | 13.7                           | 2.67 ( $\pm$ 0.38) $\times 10^8$ <sup>a</sup> | 587                            |
| T•A        | 48.8                                | 2.3                                 | 21.2                           | 3.49 ( $\pm$ 0.54) $\times 10^8$ <sup>a</sup> | 803                            |
| T•G        | 70.2                                | 3.6                                 | 19.5                           | 1.25 ( $\pm$ 0.10) $\times 10^8$              | 450                            |
| T•T        | 89.7                                | 5.6                                 | 16.0                           | 4.96 ( $\pm$ 0.28) $\times 10^7$              | 278                            |
| T•C        | 113.3                               | 6.5                                 | 17.4                           | 2.92 ( $\pm$ 0.16) $\times 10^7$              | 190                            |
| L•A        | 70.1                                | 5.1                                 | 13.7                           | 5.66 ( $\pm$ 0.43) $\times 10^7$              | 190                            |
| L•G        | 103.5                               | 6.3                                 | 16.4                           | 1.70 ( $\pm$ 0.12) $\times 10^7$              | 107                            |
| L•T        | 188.8                               | 10.1                                | 16.4                           | 9.04 ( $\pm$ 0.46) $\times 10^6$              | 91                             |
| L•C        | 190.1                               | 10.1                                | 18.8                           | 4.80 ( $\pm$ 0.29) $\times 10^6$              | 48                             |
| F•A        | 195.1                               | 10.2                                | 19.1                           | 3.93 ( $\pm$ 0.19) $\times 10^7$              | 401                            |
| F•G        | 200.1                               | 10.0                                | 20.0                           | 1.51 ( $\pm$ 0.07) $\times 10^7$              | 150                            |
| F•T        | 199.4                               | 10.1                                | 19.7                           | 1.07 ( $\pm$ 0.04) $\times 10^7$              | 108                            |
| F•C        | 191.2                               | 10.2                                | 18.7                           | 1.01 ( $\pm$ 0.04) $\times 10^7$              | 103                            |
| AT•AT      | 42.5                                | 2.4                                 | 17.7                           | 9.16 ( $\pm$ 1.35) $\times 10^8$              | 2198                           |
| GT•GT      | 99.8                                | 4.8                                 | 20.8                           | 1.10 ( $\pm$ 0.08) $\times 10^8$              | 528                            |
| TT•TT      | 196.8                               | 9.5                                 | 20.7                           | 2.72 ( $\pm$ 0.06) $\times 10^7$              | 258                            |
| CT•CT      | 244.6                               | 12.5                                | 19.6                           | 7.63 ( $\pm$ 0.26) $\times 10^6$              | 95                             |
| AL•AL      | 181.7                               | 8.8                                 | 20.6                           | 1.28 ( $\pm$ 0.07) $\times 10^7$              | 113                            |
| GL•GL      | 304.0                               | 11.8                                | 25.8                           | 1.68 ( $\pm$ 0.05) $\times 10^6$              | 20                             |
| TL•TL      | 241.6                               | 9.9                                 | 24.4                           | 2.38 ( $\pm$ 0.05) $\times 10^6$              | 24                             |
| CL•CL      | 481.1                               | 15.1                                | 31.9                           | 4.84 ( $\pm$ 0.09) $\times 10^5$              | 7                              |
| AF•AF      | 185.4                               | 9.2                                 | 20.2                           | 7.48 ( $\pm$ 0.18) $\times 10^6$              | 69                             |
| GF•GF      | 232.0                               | 9.3                                 | 24.9                           | 1.90 ( $\pm$ 0.06) $\times 10^6$              | 18                             |
| TF•TF      | 244.2                               | 9.2                                 | 26.5                           | 1.60 ( $\pm$ 0.04) $\times 10^6$              | 15                             |
| CF•CF      | 234.3                               | 10.7                                | 21.9                           | 7.86 ( $\pm$ 0.20) $\times 10^5$              | 8                              |
| AF•AT      | 45.2                                | 3.0                                 | 15.1                           | 1.74 ( $\pm$ 0.15) $\times 10^8$              | 522                            |
| AT•AF      | 43.3                                | 3.0                                 | 14.4                           | 1.56 ( $\pm$ 0.15) $\times 10^8$              | 468                            |

<sup>a</sup> K<sub>a</sub> for T•A in this paper was calculated from averaging K<sub>a</sub> values obtained from two experiments.

**Fig. S3.** Representative ITC curves for the modified DNA duplexes obtained at 25 °C.

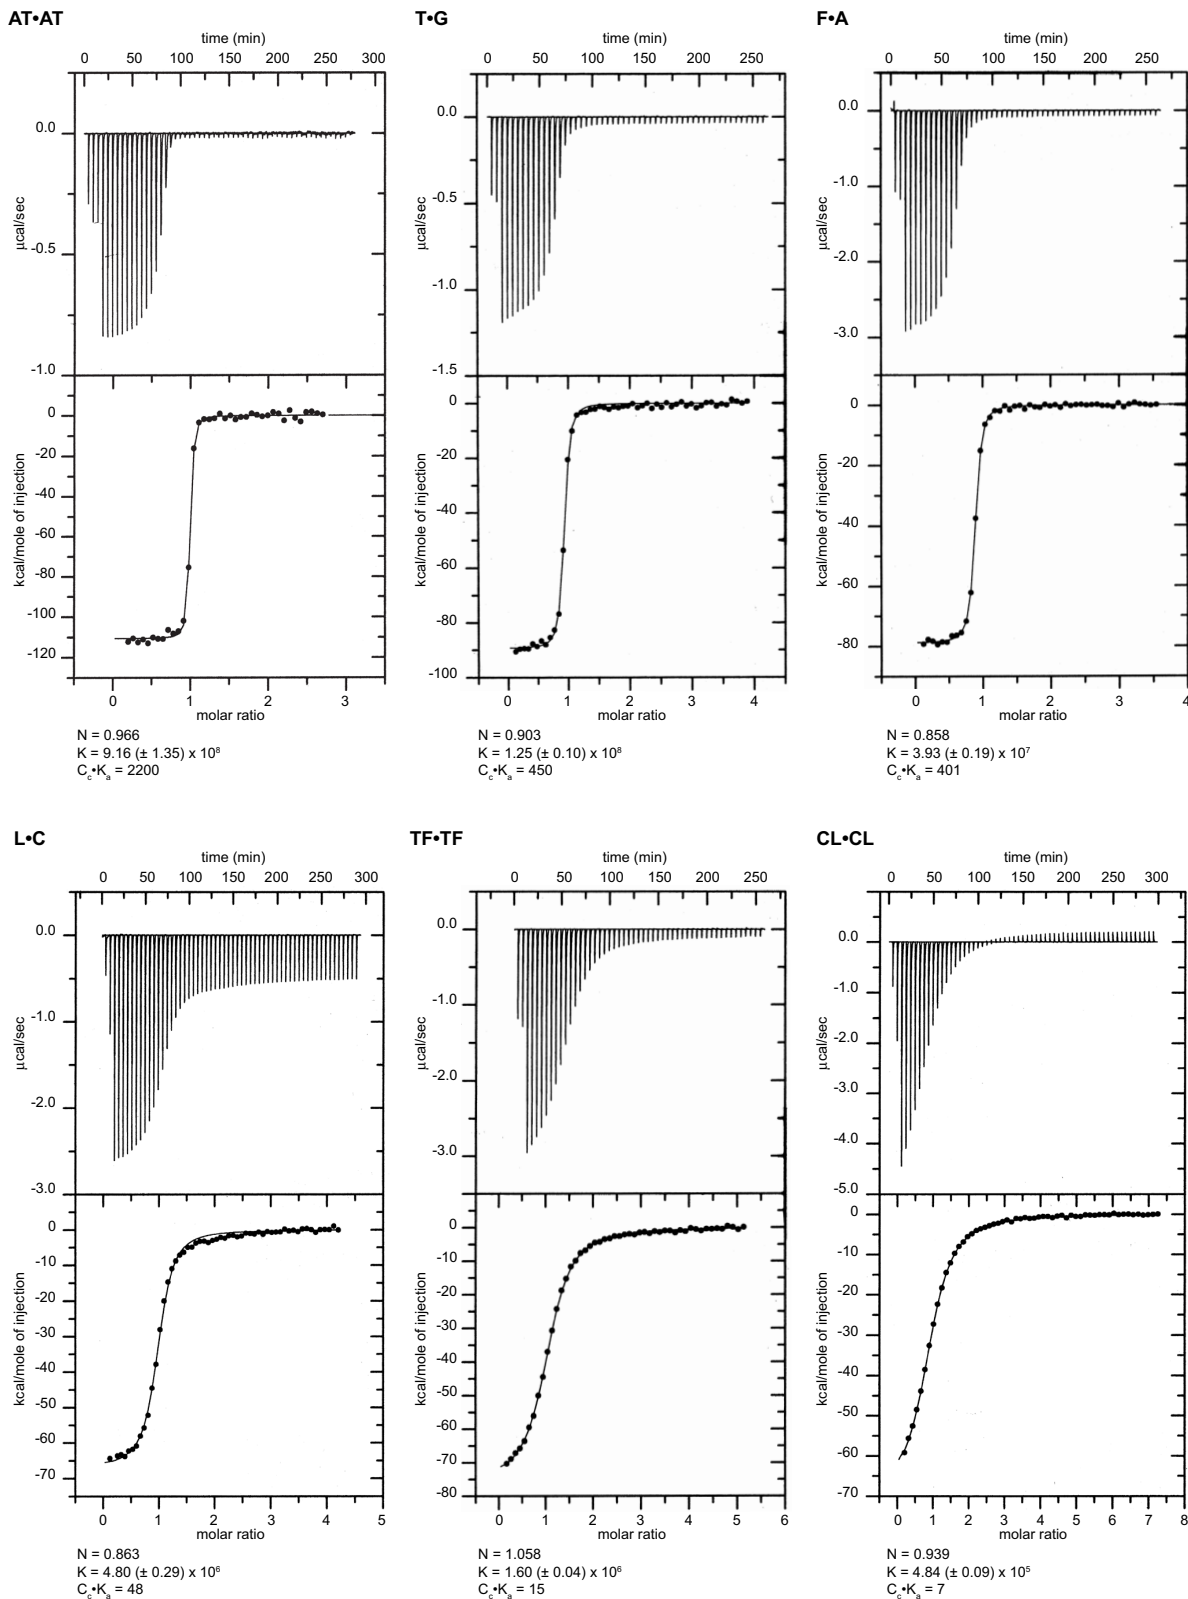



### Estimation of $\Delta G^{\circ}_{itc}$ for AT•AT and T•A duplexes

As mentioned in the paper, an accurate measurement of  $K_a$  and  $\Delta G^{\circ}$  for AT•AT duplex was not possible, because the experimentally obtained  $K_a$  was outside of the optimal range ( $1000/C_c > K_{a,25} > 1/C_c$ ) and appeared to be underestimated (see plots below). To fit  $K_a$  within the optimal range, one can decrease  $C_c$  as low as possible but still yield a measurable hybridization heat. However, our ITC measurement with the lowest possible  $C_c$  of the AT duplex (2.4  $\mu$ M) provided a  $K_a$  value that still did not fit within the optimal range. To solve this issue, we instead indirectly determined the desired thermodynamic values for the double-substituted duplex by summing the stabilization of two half-substituted duplexes.

To do this, we prepared two new 14-bp duplexes, AT•AF and AF•AT, each containing one T/A and one F/A (Table 1). We worked under the assumption that the difference between the  $\Delta G^{\circ}$  of these duplexes and that of AF•AF duplex ( $\Delta\Delta G^{\circ}_1$  and  $\Delta\Delta G^{\circ}_2$ , respectively) could be summed to provide a more accurate hybridization  $\Delta G^{\circ}$  value, and consequently  $K_a$ , for the full AT•AT duplex. The additivity of the  $\Delta\Delta G^{\circ}$  values was first verified by thermal denaturation experiments. We then estimated the  $\Delta G^{\circ}_{25,itc}$  and  $K_{a,25}$  for AT•AT duplex using the sum of the  $\Delta\Delta G^{\circ}_{itc}$  values:

$$\Delta G^{\circ}_{25,itc} \text{ for AT}\bullet\text{AT} = \Delta G^{\circ}_{25,itc} \text{ for AF}\bullet\text{AF} + \Delta\Delta G^{\circ}_{1,itc} + \Delta\Delta G^{\circ}_{2,itc}$$

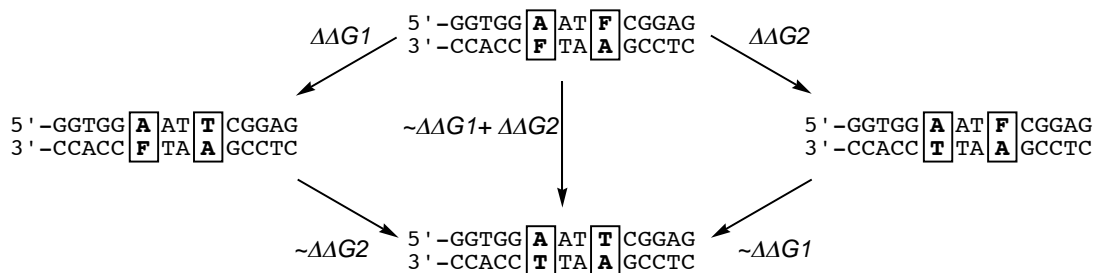

Thermal denaturation experiments verified that the replacement of the two F/A base pairs in AF•AF duplexes with T/A base pairs changes the hybridization thermodynamic values largely in an additive manner. These experiments show that AF•AT and AT•AF duplexes are 3.5–3.6 kcal/mol more stable than AF•AF duplex and 3.4–3.5 Kcal/mol less stable than AT•AT duplex at 37 °C. With respect to the fully substituted AF•AF duplex, the AT•AT duplex displays twice the stabilization as the monosubstituted AF•AT and AT•AF duplexes. We thus estimated the  $\Delta G^{\circ}_{25,itc}$  of AT•AT and T•A duplexes as below:

$$\Delta G^{\circ}_{25,itc} \text{ of AT}\bullet\text{AT} = \Delta G^{\circ}_{25,itc} \text{ of AF}\bullet\text{AF} + (\Delta G^{\circ}_{25,itc} \text{ of AF}\bullet\text{AT} - \Delta G^{\circ}_{25,itc} \text{ of AF}\bullet\text{AF}) + (\Delta G^{\circ}_{25,itc} \text{ of AT}\bullet\text{AF} - \Delta G^{\circ}_{25,itc} \text{ of AF}\bullet\text{AF}) = -13.04 \text{ Kcal/mol}$$

We similarly used the average of these  $\Delta\Delta G_{itc}^{\circ}$  values to better determine the  $K_a$  and  $\Delta G^{\circ}$  for 12mer T•A duplex, which also appeared to be underestimated by a direct ITC measurement, from those for F•A 12mer duplex:

$$\Delta G_{25,itc}^{\circ} \text{ for T}\cdot\text{A} = \Delta G_{25,itc}^{\circ} \text{ for F}\cdot\text{A} + (\Delta\Delta G_{1,itc}^{\circ} + \Delta\Delta G_{2,itc}^{\circ})/2$$

or

$$\Delta G_{25,itc}^{\circ} \text{ of T}\cdot\text{A} = \Delta G_{25,itc}^{\circ} \text{ of F}\cdot\text{A} + [(\Delta G_{25,itc}^{\circ} \text{ of AF}\cdot\text{AT} - \Delta G_{25,itc}^{\circ} \text{ of AF}\cdot\text{AF}) + (\Delta G_{25,itc}^{\circ} \text{ of AT}\cdot\text{AF} - \Delta G_{25,itc}^{\circ} \text{ of AF}\cdot\text{AF})]/2 = -12.22 \text{ Kcal/mol}$$

Plotted fits to the melting vs. ITC free energy data show that these indirectly measured values for the all-A/T duplexes better fit the entire data set (see plots below), thus providing confidence that (a) the originally measured values were indeed underestimated and (b) that the values estimated from the half-substitutions are more reliable.

**Fig. S4.** Correlation plots of  $T_m$  vs  $\Delta G_{\text{melt}25}$  and  $\Delta G_{\text{melt}37}$

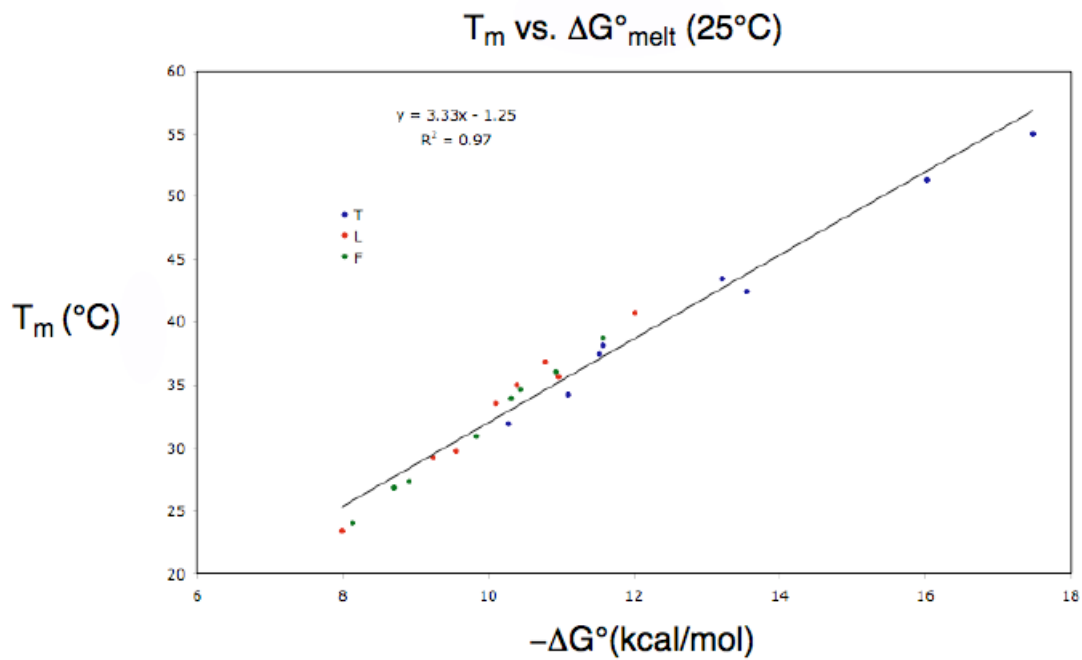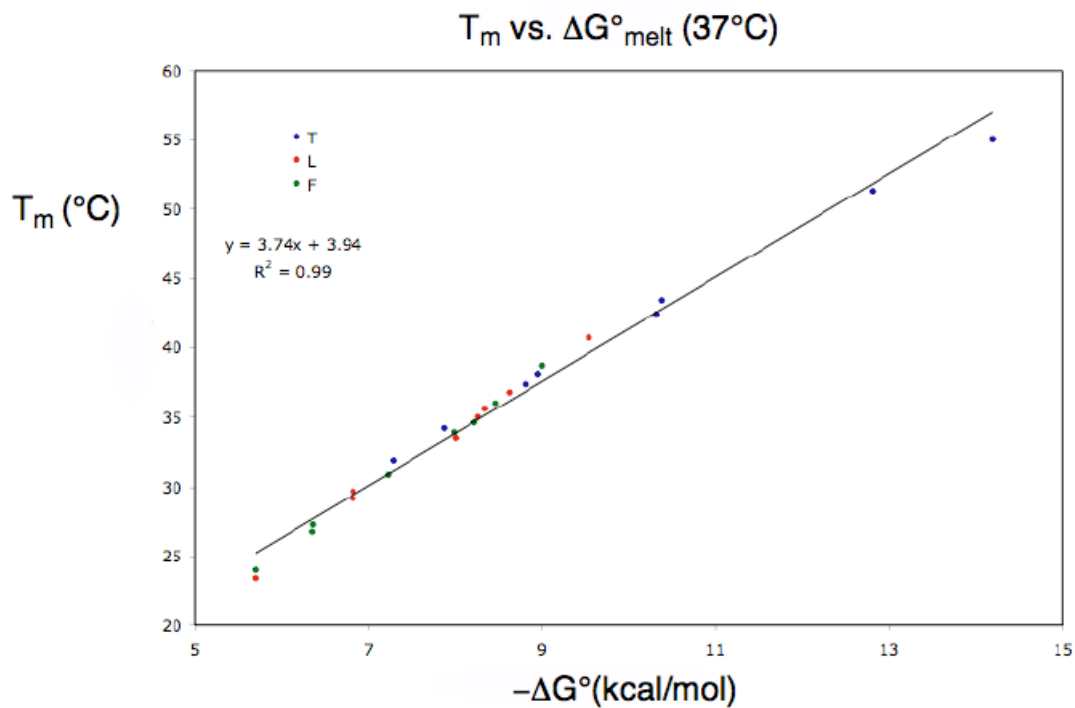

Fig. S5. Plots of  $\Delta G_{\text{melt}37}$  vs  $\Delta G_{\text{itc}25}$

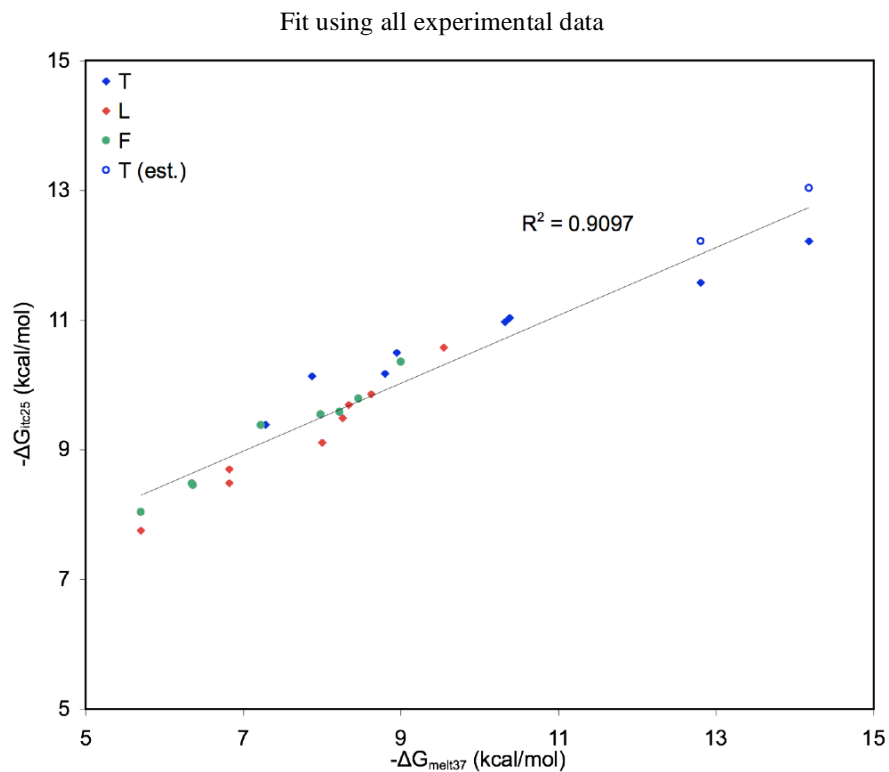

Fit of experimental data excluding duplexes with T/A base pairs, showing better fit to the data and showing better fit to estimated values for T/A duplexes (open circles)

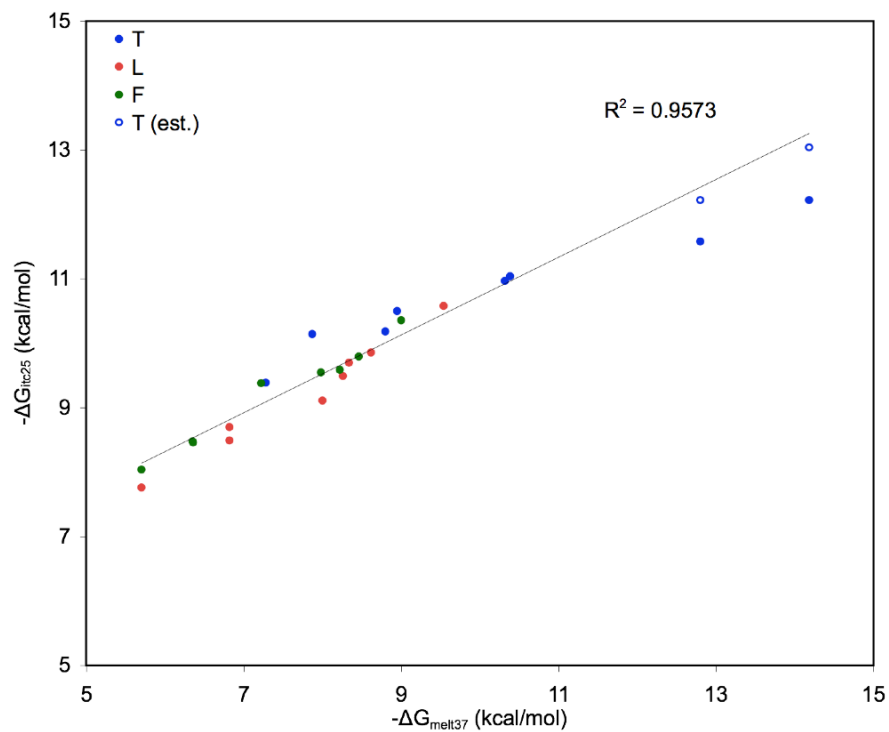

Full Citation for Gaussian09:

Gaussian 09, Revision A.02, Frisch, M. J.; Trucks, G. W.; Schlegel, H. B.; Scuseria, G. E.; Robb, M. A.; Cheeseman, J. R.; Scalmani, G.; Barone, V.; Mennucci, B.; Petersson, G. A.; Nakatsuji, H.; Caricato, M.; Li, X.; Hratchian, H. P.; Izmaylov, A. F.; Bloino, J.; Zheng, G.; Sonnenberg, J. L.; Hada, M.; Ehara, M.; Toyota, K.; Fukuda, R.; Hasegawa, J.; Ishida, M.; Nakajima, T.; Honda, Y.; Kitao, O.; Nakai, H.; Vreven, T.; Montgomery, Jr., J. A.; Peralta, J. E.; Ogliaro, F.; Bearpark, M.; Heyd, J. J.; Brothers, E.; Kudin, K. N.; Staroverov, V. N.; Kobayashi, R.; Normand, J.; Raghavachari, K.; Rendell, A.; Burant, J. C.; Iyengar, S. S.; Tomasi, J.; Cossi, M.; Rega, N.; Millam, N. J.; Klene, M.; Knox, J. E.; Cross, J. B.; Bakken, V.; Adamo, C.; Jaramillo, J.; Gomperts, R.; Stratmann, R. E.; Yazyev, O.; Austin, A. J.; Cammi, R.; Pomelli, C.; Ochterski, J. W.; Martin, R. L.; Morokuma, K.; Zakrzewski, V. G.; Voth, G. A.; Salvador, P.; Dannenberg, J. J.; Dapprich, S.; Daniels, A. D.; Farkas, Ö.; Foresman, J. B.; Ortiz, J. V.; Cioslowski, J.; Fox, D. J. Gaussian, Inc., Wallingford CT, 2009.

**Fig. S6.** Optimized structures for the pairs in this study. H...X distances (in Å) are listed in black, and heavy atom distances (X...H...X) are in blue.

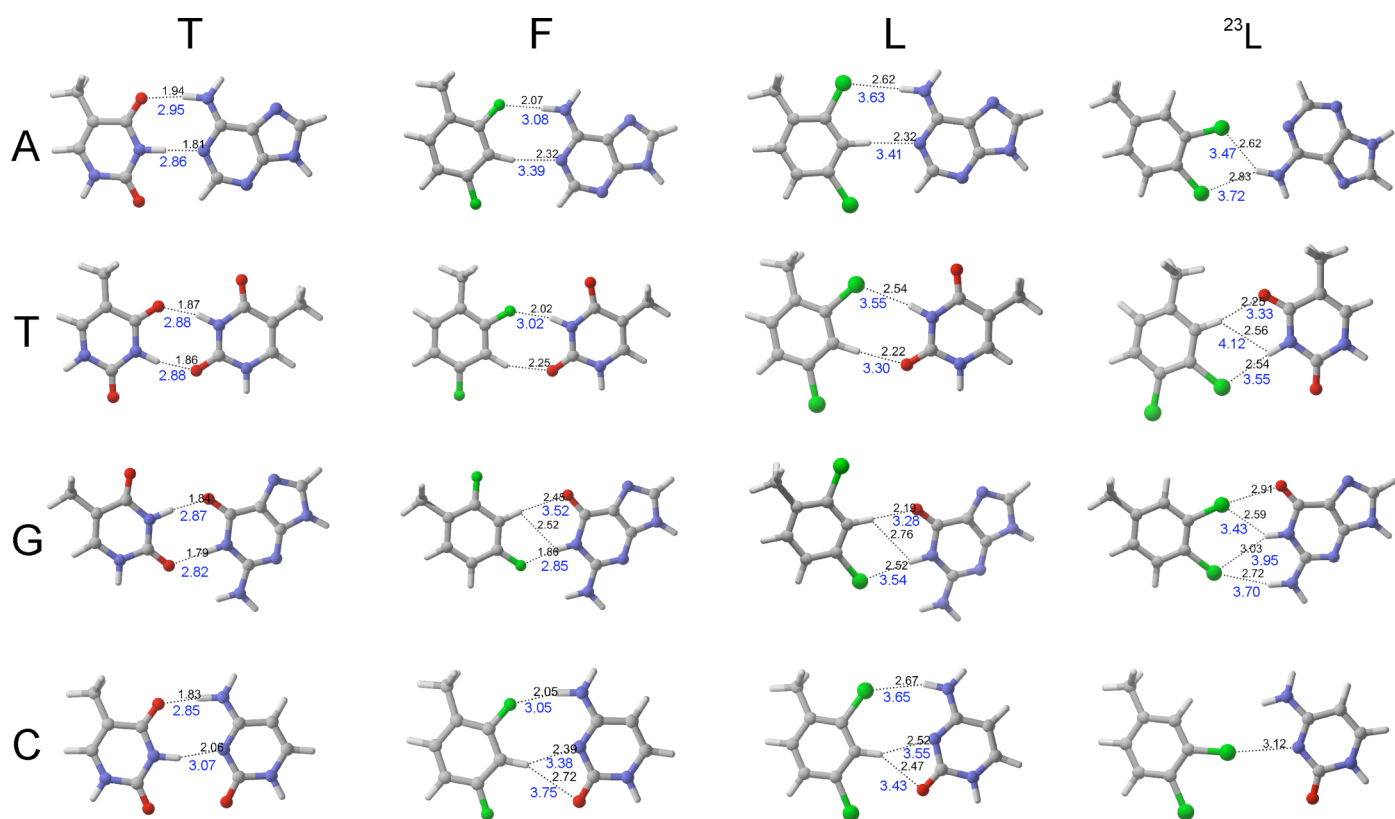

**Table S4.** M06-2X/6-31+G(*d*) absolute energies (hartree) in the gas phase, and in water (CPCM).

|                         | Gas Phase   |             |            | Water (CPCM) |             |            |
|-------------------------|-------------|-------------|------------|--------------|-------------|------------|
|                         | Dimer       | Monomer1    | Monomer2   | Dimer        | Monomer1    | Monomer2   |
| <b>TA</b>               | -921.14783  | -453.96836  | -467.15576 | -921.15109   | -453.97331  | -467.16066 |
| <b>TC</b>               | -848.77403  | -453.96836  | -394.78482 | -848.78623   | -453.97331  | -394.79945 |
| <b>TG</b>               | -996.36074  | -453.96836  | -542.36535 | -996.37391   | -453.97331  | -542.38235 |
| <b>TT</b>               | -907.95677  | -453.96836  | -453.96836 | -907.96245   | -453.97331  | -453.97331 |
| <b>FA</b>               | -937.03085  | -469.86776  | -467.15576 | -937.02319   | -469.85926  | -467.16066 |
| <b>FC</b>               | -864.66132  | -469.86776  | -394.78482 | -864.66307   | -469.85926  | -394.79945 |
| <b>FG</b>               | -1012.24391 | -469.86776  | -542.36535 | -1012.24650  | -469.85926  | -542.38235 |
| <b>FT</b>               | -923.84330  | -469.86776  | -453.96836 | -923.83610   | -469.85926  | -453.97331 |
| <b>LA</b>               | -1657.74431 | -1190.58207 | -467.15576 | -1657.73715  | -1190.57380 | -467.16066 |
| <b>LC</b>               | -1585.37314 | -1190.58207 | -394.78482 | -1585.37419  | -1190.57380 | -394.79945 |
| <b>LG</b>               | -1732.95535 | -1190.58207 | -542.36535 | -1732.95779  | -1190.57380 | -542.38235 |
| <b>LT</b>               | -1644.55610 | -1190.58207 | -453.96836 | -1644.54901  | -1190.57380 | -453.97331 |
| <sup>23</sup> <b>LA</b> | -1657.73629 | -1190.57793 | -467.15576 | -1657.73126  | -1190.57004 | -467.16066 |
| <sup>23</sup> <b>LC</b> | -1585.36476 | -1190.57793 | -394.78482 | -1585.36985  | -1190.57004 | -394.79945 |
| <sup>23</sup> <b>LG</b> | -1732.95321 | -1190.57793 | -542.36535 | -1732.95458  | -1190.57004 | -542.38235 |
| <sup>23</sup> <b>LT</b> | -1644.55338 | -1190.57793 | -453.96836 | -1644.54580  | -1190.57004 | -453.97331 |

**M06-2X/6-31+G(d) Optimized Cartesian Coordinates (Å)**  
**Gas-Phase**

|    |            |            |           |
|----|------------|------------|-----------|
| 15 |            |            |           |
| A  |            |            |           |
| N  | 1.6634880  | -1.1347290 | 0.0000000 |
| C  | 0.6602150  | -2.0270920 | 0.0000000 |
| N  | -0.6503780 | -1.8056760 | 0.0000000 |
| C  | -0.9217550 | -0.4955690 | 0.0000000 |
| C  | 0.0000000  | 0.5477780  | 0.0000000 |
| C  | 1.3576280  | 0.1677090  | 0.0000000 |
| N  | 2.3515760  | 1.0797100  | 0.0000000 |
| N  | -0.6269150 | 1.7780380  | 0.0000000 |
| C  | -1.8990750 | 1.4819110  | 0.0000000 |
| N  | -2.1449990 | 0.1283710  | 0.0000000 |
| H  | 0.9681320  | -3.0695610 | 0.0000000 |
| H  | -2.7057310 | 2.2029150  | 0.0000000 |
| H  | 3.3102090  | 0.7650410  | 0.0000000 |
| H  | 2.1400180  | 2.0659980  | 0.0000000 |
| H  | -3.0441170 | -0.3328050 | 0.0000000 |
| 13 |            |            |           |
| C  |            |            |           |
| N  | 0.0000000  | 1.0543690  | 0.0000000 |
| C  | -1.2203020 | 0.4327720  | 0.0000000 |
| N  | -1.2054260 | -0.9868320 | 0.0000000 |
| C  | -0.0679600 | -1.7196450 | 0.0000000 |
| C  | 1.1374060  | -1.1008390 | 0.0000000 |
| C  | 1.1038530  | 0.3412520  | 0.0000000 |
| N  | 2.2756870  | 1.0194880  | 0.0000000 |
| H  | 2.2434950  | 2.0291070  | 0.0000000 |
| H  | 3.1677750  | 0.5523670  | 0.0000000 |
| O  | -2.2982520 | 0.9961290  | 0.0000000 |
| H  | 2.0650500  | -1.6581220 | 0.0000000 |
| H  | -0.1817190 | -2.7988540 | 0.0000000 |
| H  | -2.1183930 | -1.4239490 | 0.0000000 |
| 15 |            |            |           |
| F  |            |            |           |
| C  | 1.2618830  | -0.9989890 | 0.0000000 |
| C  | 0.0000000  | 0.9971020  | 0.0000000 |
| C  | -1.2075800 | 0.3022250  | 0.0000000 |
| C  | -1.1218440 | -1.0912680 | 0.0000000 |
| C  | -2.5151290 | 1.0469710  | 0.0000000 |
| H  | 2.1585300  | 0.9690020  | 0.0000000 |

|    |            |            |            |
|----|------------|------------|------------|
| H  | -2.0410180 | -1.6711610 | 0.0000000  |
| H  | -3.3534660 | 0.3460250  | 0.0000000  |
| H  | -2.6034820 | 1.6903340  | 0.8810850  |
| H  | -2.6034820 | 1.6903340  | -0.8810850 |
| H  | 0.1676150  | -2.8400600 | 0.0000000  |
| F  | -0.0455260 | 2.3448230  | 0.0000000  |
| F  | 2.4554380  | -1.6227840 | 0.0000000  |
| C  | 1.2437130  | 0.3879460  | 0.0000000  |
| C  | 0.1033060  | -1.7577900 | 0.0000000  |
| 16 |            |            |            |
| G  |            |            |            |
| N  | 1.4251250  | -0.8716190 | 0.0000000  |
| C  | 0.3528240  | -1.7260380 | 0.0000000  |
| N  | -0.8918360 | -1.3268470 | 0.0000000  |
| C  | -0.9998330 | 0.0272540  | 0.0000000  |
| C  | 0.0000000  | 0.9912240  | 0.0000000  |
| C  | 1.3731940  | 0.5563050  | 0.0000000  |
| N  | -0.5347690 | 2.2600740  | 0.0000000  |
| C  | -1.8236100 | 2.0711420  | 0.0000000  |
| N  | -2.1669230 | 0.7336910  | 0.0000000  |
| H  | -2.5744270 | 2.8493520  | 0.0000000  |
| H  | -3.0952270 | 0.3345520  | 0.0000000  |
| N  | 0.6256340  | -3.0573860 | 0.0000000  |
| H  | -0.1553610 | -3.6958820 | 0.0000000  |
| H  | 1.5616670  | -3.4285020 | 0.0000000  |
| O  | 2.4095160  | 1.1866420  | 0.0000000  |
| H  | 2.3711600  | -1.2373660 | 0.0000000  |



|    |            |            |            |
|----|------------|------------|------------|
| 15 |            |            |            |
| T  |            |            |            |
| N  | 0.1548320  | -1.6637860 | 0.0000000  |
| C  | 1.3575030  | -0.9817700 | 0.0000000  |
| O  | 2.4368840  | -1.5371500 | 0.0000000  |
| N  | 1.1975030  | 0.3910610  | 0.0000000  |
| C  | 0.0000000  | 1.1168550  | 0.0000000  |
| O  | 0.0156520  | 2.3328180  | 0.0000000  |
| C  | -1.2180010 | 0.2961030  | 0.0000000  |
| C  | -1.0771840 | -1.0433630 | 0.0000000  |
| C  | -2.5348430 | 1.0100530  | 0.0000000  |
| H  | 2.0555340  | 0.9337190  | 0.0000000  |
| H  | -1.9298860 | -1.7151900 | 0.0000000  |
| H  | -3.3648380 | 0.2984610  | 0.0000000  |
| H  | -2.6228570 | 1.6557070  | 0.8792340  |
| H  | -2.6228570 | 1.6557070  | -0.8792340 |
| H  | 0.2334300  | -2.6719470 | 0.0000000  |
| 30 |            |            |            |
| FA |            |            |            |
| N  | -1.1516590 | -0.7182450 | 0.0000000  |
| C  | -2.4933630 | -0.6525100 | 0.0000000  |
| N  | -3.3737540 | -1.6466730 | 0.0000000  |
| C  | -2.7606680 | -2.8370030 | 0.0000000  |
| C  | -1.3885790 | -3.0705370 | 0.0000000  |
| C  | -0.5657770 | -1.9245150 | 0.0000000  |
| N  | 0.7767820  | -2.0105320 | 0.0000000  |
| N  | -1.1046930 | -4.4216180 | 0.0000000  |
| C  | -2.2804900 | -4.9898830 | 0.0000000  |
| N  | -3.3213290 | -4.0900180 | 0.0000000  |
| H  | -2.9071990 | 0.3533320  | 0.0000000  |
| H  | -2.4562650 | -6.0574240 | 0.0000000  |
| H  | 1.3393410  | -1.1696650 | 0.0000000  |
| H  | 1.2219490  | -2.9160000 | 0.0000000  |
| C  | 0.3614150  | 3.4438670  | 0.0000000  |
| C  | 2.0889150  | 1.8497520  | 0.0000000  |
| C  | 3.0824480  | 2.8239830  | 0.0000000  |
| C  | 2.6419870  | 4.1491960  | 0.0000000  |
| C  | 4.5371430  | 2.4388890  | 0.0000000  |
| H  | 0.0000000  | 1.2982830  | 0.0000000  |
| H  | 3.3810470  | 4.9460420  | 0.0000000  |
| H  | 5.1674610  | 3.3315670  | 0.0000000  |
| H  | 4.7884590  | 1.8405980  | 0.8815490  |
| H  | 4.7884590  | 1.8405980  | -0.8815490 |
| H  | -4.3107730 | -4.2951230 | 0.0000000  |

|    |            |            |            |
|----|------------|------------|------------|
| H  | 0.9450340  | 5.5050300  | 0.0000000  |
| F  | 2.4881640  | 0.5489630  | 0.0000000  |
| F  | -0.9513110 | 3.7456920  | 0.0000000  |
| C  | 0.7296060  | 2.1064480  | 0.0000000  |
| C  | 1.2862600  | 4.4757220  | 0.0000000  |
| 28 |            |            |            |
| FC |            |            |            |
| N  | -1.7372570 | -0.7963680 | 0.0000000  |
| C  | -2.7895680 | 0.0755140  | 0.0000000  |
| N  | -4.0855770 | -0.4957610 | 0.0000000  |
| C  | -4.3049700 | -1.8322830 | 0.0000000  |
| C  | -3.2598700 | -2.6943640 | 0.0000000  |
| C  | -1.9463120 | -2.0968340 | 0.0000000  |
| N  | -0.8571360 | -2.8926790 | 0.0000000  |
| H  | 0.0554990  | -2.4530910 | 0.0000000  |
| H  | -0.9294070 | -3.8970710 | 0.0000000  |
| C  | 2.8481790  | 2.7576750  | 0.0000000  |
| C  | 1.5029760  | 2.4214510  | 0.0000000  |
| F  | 0.5930030  | 3.4101090  | 0.0000000  |
| C  | 1.0568390  | 1.1066860  | 0.0000000  |
| C  | 2.0416170  | 0.1341770  | 0.0000000  |
| F  | 1.6572760  | -1.1723640 | 0.0000000  |
| C  | 3.4107760  | 0.3862640  | 0.0000000  |
| C  | 3.7897110  | 1.7298760  | 0.0000000  |
| C  | 4.4007080  | -0.7474060 | 0.0000000  |
| H  | 0.0000000  | 0.8503580  | 0.0000000  |
| H  | 4.8484580  | 1.9759720  | 0.0000000  |
| H  | 5.4228690  | -0.3604240 | 0.0000000  |
| H  | 4.2751880  | -1.3841690 | 0.8817210  |
| H  | 4.2751880  | -1.3841690 | -0.8817210 |
| H  | 3.1402230  | 3.8020790  | 0.0000000  |
| O  | -2.6856210 | 1.2893170  | 0.0000000  |
| H  | -3.4057420 | -3.7667150 | 0.0000000  |
| H  | -5.3406890 | -2.1559350 | 0.0000000  |
| H  | -4.8498530 | 0.1680470  | 0.0000000  |

|    |            |            |            |
|----|------------|------------|------------|
| 31 |            |            |            |
| FG |            |            |            |
| N  | -0.9823540 | 1.3253140  | 0.0000000  |
| C  | -1.3223090 | 2.6513240  | 0.0000000  |
| N  | -2.5573490 | 3.0861160  | 0.0000000  |
| C  | -3.4563240 | 2.0695980  | 0.0000000  |
| C  | -3.2367730 | 0.6964500  | 0.0000000  |
| C  | -1.8785710 | 0.2242940  | 0.0000000  |
| N  | -4.4276460 | 0.0039890  | 0.0000000  |
| C  | -5.3434830 | 0.9297080  | 0.0000000  |
| N  | -4.8140480 | 2.2054630  | 0.0000000  |
| H  | -6.4114340 | 0.7593900  | 0.0000000  |
| C  | 3.9995420  | -0.2313250 | 0.0000000  |
| C  | 2.6173890  | -0.2434320 | 0.0000000  |
| F  | 1.9642590  | 0.9582390  | 0.0000000  |
| C  | 1.8569670  | -1.4007800 | 0.0000000  |
| C  | 2.5704920  | -2.5897930 | 0.0000000  |
| F  | 1.8793470  | -3.7436100 | 0.0000000  |
| C  | 3.9625920  | -2.6695190 | 0.0000000  |
| C  | 4.6593230  | -1.4604320 | 0.0000000  |
| C  | 4.6437760  | -4.0109300 | 0.0000000  |
| H  | 0.7674160  | -1.3900820 | 0.0000000  |
| H  | 5.7458290  | -1.4803230 | 0.0000000  |
| H  | 5.7296980  | -3.8889580 | 0.0000000  |
| H  | 4.3610190  | -4.5958410 | 0.8807930  |
| H  | 4.3610190  | -4.5958410 | -0.8807930 |
| H  | -5.3158160 | 3.0824370  | 0.0000000  |
| H  | 4.5372000  | 0.7102350  | 0.0000000  |
| N  | -0.2940140 | 3.5376510  | 0.0000000  |
| H  | -0.5173820 | 4.5207670  | 0.0000000  |
| H  | 0.6711980  | 3.2468560  | 0.0000000  |
| O  | -1.4286310 | -0.9083720 | 0.0000000  |
| H  | 0.0000000  | 1.0659620  | 0.0000000  |

|    |            |            |           |
|----|------------|------------|-----------|
| 30 |            |            |           |
| FT |            |            |           |
| N  | -3.1783830 | 1.6829540  | 0.0000000 |
| C  | -2.0222950 | 0.9280610  | 0.0000000 |
| O  | -2.0331240 | -0.2900240 | 0.0000000 |
| N  | -0.8730370 | 1.6866240  | 0.0000000 |
| C  | -0.7741390 | 3.0835970  | 0.0000000 |
| O  | 0.3137520  | 3.6266520  | 0.0000000 |
| C  | -2.0595510 | 3.7958850  | 0.0000000 |
| C  | -3.1888530 | 3.0626140  | 0.0000000 |
| C  | -2.0214820 | 5.2931280  | 0.0000000 |

|   |            |            |            |
|---|------------|------------|------------|
| H | 0.0000000  | 1.1623640  | 0.0000000  |
| H | -4.1754560 | 3.5154280  | 0.0000000  |
| H | -3.0322440 | 5.7099530  | 0.0000000  |
| H | -1.4857750 | 5.6644430  | 0.8790900  |
| H | -1.4857750 | 5.6644430  | -0.8790900 |
| H | -4.0390130 | 1.1520340  | 0.0000000  |
| C | 0.6816830  | -3.7639540 | 0.0000000  |
| C | 1.6073030  | -1.6027350 | 0.0000000  |
| C | 2.9122040  | -2.0863290 | 0.0000000  |
| C | 3.0516130  | -3.4756400 | 0.0000000  |
| C | 4.0814940  | -1.1392110 | 0.0000000  |
| H | -0.5216060 | -1.9519910 | 0.0000000  |
| H | 4.0518260  | -3.9008910 | 0.0000000  |
| H | 5.0221510  | -1.6953840 | 0.0000000  |
| H | 4.0650360  | -0.4897330 | -0.8809000 |
| H | 4.0650360  | -0.4897330 | 0.8809000  |
| H | 2.0564720  | -5.4063060 | 0.0000000  |
| C | 0.4713610  | -2.3925460 | 0.0000000  |
| C | 1.9475540  | -4.3273750 | 0.0000000  |
| F | 1.4445810  | -0.2527040 | 0.0000000  |
| F | -0.3920360 | -4.5770360 | 0.0000000  |

|    |            |            |            |
|----|------------|------------|------------|
| 30 |            |            |            |
| TA |            |            |            |
| N  | -0.7736160 | -0.7128480 | 0.0000000  |
| C  | -2.1193700 | -0.7479570 | 0.0000000  |
| N  | -2.9094960 | -1.8120190 | 0.0000000  |
| C  | -2.1965130 | -2.9478030 | 0.0000000  |
| C  | -0.8105010 | -3.0698740 | 0.0000000  |
| C  | -0.0757270 | -1.8634400 | 0.0000000  |
| N  | 1.2629130  | -1.8310310 | 0.0000000  |
| N  | -0.4187980 | -4.3931180 | 0.0000000  |
| C  | -1.5444210 | -5.0550250 | 0.0000000  |
| N  | -2.6541570 | -4.2411610 | 0.0000000  |
| H  | -2.6018220 | 0.2272210  | 0.0000000  |
| H  | -1.6338940 | -6.1332190 | 0.0000000  |
| H  | 1.7637560  | -0.9407040 | 0.0000000  |
| H  | 1.7744500  | -2.7012450 | 0.0000000  |
| N  | 0.2512720  | 4.1657370  | 0.0000000  |
| C  | -0.4010640 | 2.9427340  | 0.0000000  |
| O  | -1.6138770 | 2.8461360  | 0.0000000  |
| N  | 0.4541920  | 1.8645020  | 0.0000000  |
| C  | 1.8366790  | 1.8974240  | 0.0000000  |
| O  | 2.4867040  | 0.8546400  | 0.0000000  |
| C  | 2.4487220  | 3.2289350  | 0.0000000  |
| C  | 1.6214360  | 4.2940070  | 0.0000000  |
| C  | 3.9439790  | 3.3173560  | 0.0000000  |
| H  | 0.0000000  | 0.9223380  | 0.0000000  |
| H  | 1.9909630  | 5.3149890  | 0.0000000  |
| H  | 4.2736060  | 4.3599580  | 0.0000000  |
| H  | 4.3603650  | 2.8161100  | 0.8792370  |
| H  | 4.3603650  | 2.8161100  | -0.8792370 |
| H  | -3.6242800 | -4.5241100 | 0.0000000  |
| H  | -0.3516170 | 4.9777540  | 0.0000000  |

|    |            |            |           |
|----|------------|------------|-----------|
| 28 |            |            |           |
| TC |            |            |           |
| N  | -1.5970820 | -0.7822170 | 0.0000000 |
| C  | -2.7539150 | -0.0489300 | 0.0000000 |
| N  | -3.9686150 | -0.7776370 | 0.0000000 |
| C  | -4.0214280 | -2.1309440 | 0.0000000 |
| C  | -2.8779960 | -2.8544480 | 0.0000000 |
| C  | -1.6411760 | -2.1068630 | 0.0000000 |
| N  | -0.4767340 | -2.7705940 | 0.0000000 |
| H  | 0.3990750  | -2.2405660 | 0.0000000 |
| H  | -0.4550510 | -3.7778530 | 0.0000000 |
| N  | 2.3027230  | 2.8217020  | 0.0000000 |

|   |            |            |            |
|---|------------|------------|------------|
| C | 1.0014060  | 2.3281000  | 0.0000000  |
| O | 0.0396690  | 3.0606760  | 0.0000000  |
| N | 0.9420440  | 0.9425530  | 0.0000000  |
| C | 2.0217890  | 0.0759760  | 0.0000000  |
| O | 1.8615780  | -1.1431930 | 0.0000000  |
| C | 3.3530230  | 0.6858980  | 0.0000000  |
| C | 3.4240790  | 2.0318600  | 0.0000000  |
| C | 4.5423640  | -0.2248530 | 0.0000000  |
| H | 0.0000000  | 0.5147070  | 0.0000000  |
| H | 4.3705040  | 2.5642870  | 0.0000000  |
| H | 5.4724250  | 0.3504450  | 0.0000000  |
| H | 4.5317760  | -0.8763660 | 0.8794220  |
| H | 4.5317760  | -0.8763660 | -0.8794220 |
| H | 2.3699630  | 3.8307120  | 0.0000000  |
| O | -2.8038530 | 1.1660910  | 0.0000000  |
| H | -2.8885220 | -3.9366430 | 0.0000000  |
| H | -5.0089510 | -2.5809510 | 0.0000000  |
| H | -4.8073920 | -0.2114220 | 0.0000000  |

|    |            |            |            |
|----|------------|------------|------------|
| 31 |            |            |            |
| TG |            |            |            |
| N  | -1.0279370 | 1.2832830  | 0.0000000  |
| C  | -1.6570870 | 2.4956600  | 0.0000000  |
| N  | -2.9603150 | 2.6468190  | 0.0000000  |
| C  | -3.6059700 | 1.4555880  | 0.0000000  |
| C  | -3.0800720 | 0.1661710  | 0.0000000  |
| C  | -1.6527970 | 0.0245070  | 0.0000000  |
| N  | -4.0833490 | -0.7787780 | 0.0000000  |
| C  | -5.1844950 | -0.0847920 | 0.0000000  |
| N  | -4.9591510 | 1.2785720  | 0.0000000  |
| H  | -6.1860100 | -0.4930510 | 0.0000000  |
| N  | 3.8236390  | 0.2656240  | 0.0000000  |
| C  | 2.4507940  | 0.2289540  | 0.0000000  |
| O  | 1.7918500  | 1.2725170  | 0.0000000  |
| N  | 1.9097890  | -1.0227610 | 0.0000000  |
| C  | 2.6217910  | -2.2355510 | 0.0000000  |
| O  | 2.0372760  | -3.2978300 | 0.0000000  |
| C  | 4.0885580  | -2.1048870 | 0.0000000  |
| C  | 4.6151120  | -0.8679820 | 0.0000000  |
| C  | 4.8917910  | -3.3682810 | 0.0000000  |
| H  | 0.8745560  | -1.0875240 | 0.0000000  |
| H  | 5.6847170  | -0.6842320 | 0.0000000  |
| H  | 5.9634800  | -3.1520270 | 0.0000000  |
| H  | 4.6511150  | -3.9745170 | 0.8786760  |
| H  | 4.6511150  | -3.9745170 | -0.8786760 |
| H  | -5.6472390 | 2.0183520  | 0.0000000  |
| H  | 4.2327190  | 1.1901350  | 0.0000000  |
| N  | -0.8441640 | 3.5817240  | 0.0000000  |
| H  | -1.2676960 | 4.4962400  | 0.0000000  |
| H  | 0.1609840  | 3.4903260  | 0.0000000  |
| O  | -0.9607620 | -0.9900360 | 0.0000000  |
| H  | 0.0000000  | 1.2559000  | 0.0000000  |
| 30 |            |            |            |
| TT |            |            |            |
| N  | -3.2290270 | 1.0741290  | 0.0000000  |
| C  | -1.9535240 | 0.5544280  | 0.0000000  |
| O  | -1.7562650 | -0.6555590 | 0.0000000  |
| N  | -0.9599630 | 1.4957780  | 0.0000000  |
| C  | -1.1234700 | 2.8869280  | 0.0000000  |
| O  | -0.1593640 | 3.6270800  | 0.0000000  |
| C  | -2.5190450 | 3.3532680  | 0.0000000  |
| C  | -3.4964820 | 2.4283310  | 0.0000000  |
| C  | -2.7531890 | 4.8322890  | 0.0000000  |

|    |            |            |            |
|----|------------|------------|------------|
| H  | 0.0000000  | 1.1232860  | 0.0000000  |
| H  | -4.5497250 | 2.6908970  | 0.0000000  |
| H  | -3.8226410 | 5.0598310  | 0.0000000  |
| H  | -2.2923390 | 5.2938510  | 0.8788240  |
| H  | -2.2923390 | 5.2938510  | -0.8788240 |
| H  | -3.9736820 | 0.3899220  | 0.0000000  |
| N  | 2.1962530  | -3.8688050 | 0.0000000  |
| C  | 0.8770710  | -3.4403870 | 0.0000000  |
| O  | -0.0590540 | -4.2122000 | 0.0000000  |
| N  | 0.7508650  | -2.0647000 | 0.0000000  |
| C  | 1.7790170  | -1.1351990 | 0.0000000  |
| O  | 1.5387120  | 0.0683580  | 0.0000000  |
| C  | 3.1395810  | -1.6766100 | 0.0000000  |
| C  | 3.2765950  | -3.0177240 | 0.0000000  |
| C  | 4.2805230  | -0.7059810 | 0.0000000  |
| H  | -0.2067800 | -1.6866770 | 0.0000000  |
| H  | 4.2484660  | -3.5017490 | 0.0000000  |
| H  | 5.2392500  | -1.2317450 | 0.0000000  |
| H  | 4.2343990  | -0.0555960 | -0.8788650 |
| H  | 4.2343990  | -0.0555960 | 0.8788650  |
| H  | 2.3194050  | -4.8725790 | 0.0000000  |
| 15 |            |            |            |
| A  |            |            |            |
| N  | 1.6634880  | -1.1347290 | 0.0000000  |
| C  | 0.6602150  | -2.0270920 | 0.0000000  |
| N  | -0.6503780 | -1.8056760 | 0.0000000  |
| C  | -0.9217550 | -0.4955690 | 0.0000000  |
| C  | 0.0000000  | 0.5477780  | 0.0000000  |
| C  | 1.3576280  | 0.1677090  | 0.0000000  |
| N  | 2.3515760  | 1.0797100  | 0.0000000  |
| N  | -0.6269150 | 1.7780380  | 0.0000000  |
| C  | -1.8990750 | 1.4819110  | 0.0000000  |
| N  | -2.1449990 | 0.1283710  | 0.0000000  |
| H  | 0.9681320  | -3.0695610 | 0.0000000  |
| H  | -2.7057310 | 2.2029150  | 0.0000000  |
| H  | 3.3102090  | 0.7650410  | 0.0000000  |
| H  | 2.1400180  | 2.0659980  | 0.0000000  |
| H  | -3.0441170 | -0.3328050 | 0.0000000  |

|    |            |            |            |
|----|------------|------------|------------|
| 13 |            |            |            |
| C  |            |            |            |
| N  | 0.0000000  | 1.0543690  | 0.0000000  |
| C  | -1.2203020 | 0.4327720  | 0.0000000  |
| N  | -1.2054260 | -0.9868320 | 0.0000000  |
| C  | -0.0679600 | -1.7196450 | 0.0000000  |
| C  | 1.1374060  | -1.1008390 | 0.0000000  |
| C  | 1.1038530  | 0.3412520  | 0.0000000  |
| N  | 2.2756870  | 1.0194880  | 0.0000000  |
| H  | 2.2434950  | 2.0291070  | 0.0000000  |
| H  | 3.1677750  | 0.5523670  | 0.0000000  |
| O  | -2.2982520 | 0.9961290  | 0.0000000  |
| H  | 2.0650500  | -1.6581220 | 0.0000000  |
| H  | -0.1817190 | -2.7988540 | 0.0000000  |
| H  | -2.1183930 | -1.4239490 | 0.0000000  |
| 15 |            |            |            |
| F  |            |            |            |
| C  | 1.2618830  | -0.9989890 | 0.0000000  |
| C  | 0.0000000  | 0.9971020  | 0.0000000  |
| C  | -1.2075800 | 0.3022250  | 0.0000000  |
| C  | -1.1218440 | -1.0912680 | 0.0000000  |
| C  | -2.5151290 | 1.0469710  | 0.0000000  |
| H  | 2.1585300  | 0.9690020  | 0.0000000  |
| H  | -2.0410180 | -1.6711610 | 0.0000000  |
| H  | -3.3534660 | 0.3460250  | 0.0000000  |
| H  | -2.6034820 | 1.6903340  | 0.8810850  |
| H  | -2.6034820 | 1.6903340  | -0.8810850 |
| H  | 0.1676150  | -2.8400600 | 0.0000000  |
| F  | -0.0455260 | 2.3448230  | 0.0000000  |
| F  | 2.4554380  | -1.6227840 | 0.0000000  |
| C  | 1.2437130  | 0.3879460  | 0.0000000  |
| C  | 0.1033060  | -1.7577900 | 0.0000000  |
| 16 |            |            |            |
| G  |            |            |            |
| N  | 1.4251250  | -0.8716190 | 0.0000000  |
| C  | 0.3528240  | -1.7260380 | 0.0000000  |
| N  | -0.8918360 | -1.3268470 | 0.0000000  |
| C  | -0.9998330 | 0.0272540  | 0.0000000  |
| C  | 0.0000000  | 0.9912240  | 0.0000000  |
| C  | 1.3731940  | 0.5563050  | 0.0000000  |
| N  | -0.5347690 | 2.2600740  | 0.0000000  |
| C  | -1.8236100 | 2.0711420  | 0.0000000  |
| N  | -2.1669230 | 0.7336910  | 0.0000000  |

|    |            |            |            |
|----|------------|------------|------------|
| H  | -2.5744270 | 2.8493520  | 0.0000000  |
| H  | -3.0952270 | 0.3345520  | 0.0000000  |
| N  | 0.6256340  | -3.0573860 | 0.0000000  |
| H  | -0.1553610 | -3.6958820 | 0.0000000  |
| H  | 1.5616670  | -3.4285020 | 0.0000000  |
| O  | 2.4095160  | 1.1866420  | 0.0000000  |
| H  | 2.3711600  | -1.2373660 | 0.0000000  |
| 15 |            |            |            |
| T  |            |            |            |
| N  | 0.1548320  | -1.6637860 | 0.0000000  |
| C  | 1.3575030  | -0.9817700 | 0.0000000  |
| O  | 2.4368840  | -1.5371500 | 0.0000000  |
| N  | 1.1975030  | 0.3910610  | 0.0000000  |
| C  | 0.0000000  | 1.1168550  | 0.0000000  |
| O  | 0.0156520  | 2.3328180  | 0.0000000  |
| C  | -1.2180010 | 0.2961030  | 0.0000000  |
| C  | -1.0771840 | -1.0433630 | 0.0000000  |
| C  | -2.5348430 | 1.0100530  | 0.0000000  |
| H  | 2.0555340  | 0.9337190  | 0.0000000  |
| H  | -1.9298860 | -1.7151900 | 0.0000000  |
| H  | -3.3648380 | 0.2984610  | 0.0000000  |
| H  | -2.6228570 | 1.6557070  | 0.8792340  |
| H  | -2.6228570 | 1.6557070  | -0.8792340 |
| H  | 0.2334300  | -2.6719470 | 0.0000000  |

|    |            |            |            |
|----|------------|------------|------------|
| 30 |            |            |            |
| LA |            |            |            |
| N  | -0.6727890 | -1.3086070 | 0.0000000  |
| C  | -1.9988580 | -1.5262730 | 0.0000000  |
| N  | -2.6490370 | -2.6845000 | 0.0000000  |
| C  | -1.7995840 | -3.7189400 | 0.0000000  |
| C  | -0.4090030 | -3.6582160 | 0.0000000  |
| C  | 0.1524340  | -2.3646490 | 0.0000000  |
| N  | 1.4837840  | -2.1656540 | 0.0000000  |
| N  | 0.1533970  | -4.9191920 | 0.0000000  |
| C  | -0.8763420 | -5.7223010 | 0.0000000  |
| N  | -2.0834960 | -5.0620600 | 0.0000000  |
| H  | -2.6136500 | -0.6297040 | 0.0000000  |
| H  | -0.8231680 | -6.8029300 | 0.0000000  |
| H  | 1.8506770  | -1.2234510 | 0.0000000  |
| H  | 2.1132440  | -2.9542170 | 0.0000000  |
| C  | -0.7585240 | 2.9361930  | 0.0000000  |
| C  | 1.5624780  | 2.4131590  | 0.0000000  |
| C  | 1.9214410  | 3.7646820  | 0.0000000  |
| C  | 0.8731560  | 4.6889660  | 0.0000000  |
| C  | 3.3584880  | 4.2091650  | 0.0000000  |
| H  | 0.0000000  | 0.9111330  | 0.0000000  |
| H  | 1.1120770  | 5.7492760  | 0.0000000  |
| H  | 3.4211140  | 5.2999000  | 0.0000000  |
| H  | 3.8881850  | 3.8318390  | 0.8809610  |
| H  | 3.8881850  | 3.8318390  | -0.8809610 |
| H  | -3.0075120 | -5.4711690 | 0.0000000  |
| H  | -1.2607870 | 5.0271710  | 0.0000000  |
| Cl | 2.8349720  | 1.2055070  | 0.0000000  |
| Cl | -2.4256800 | 2.4227550  | 0.0000000  |
| C  | 0.2440560  | 1.9727000  | 0.0000000  |
| C  | -0.4612960 | 4.2938400  | 0.0000000  |

|    |            |            |           |
|----|------------|------------|-----------|
| 28 |            |            |           |
| LC |            |            |           |
| N  | -1.7875030 | -1.2513110 | 0.0000000 |
| C  | -2.7301540 | -0.2619300 | 0.0000000 |
| N  | -4.0847380 | -0.6735790 | 0.0000000 |
| C  | -4.4627930 | -1.9739160 | 0.0000000 |
| C  | -3.5275030 | -2.9539320 | 0.0000000 |
| C  | -2.1528790 | -2.5159730 | 0.0000000 |
| N  | -1.1677980 | -3.4389830 | 0.0000000 |
| H  | -0.2113090 | -3.1096400 | 0.0000000 |
| H  | -1.3566450 | -4.4280720 | 0.0000000 |
| C  | 2.4498480  | 2.9065700  | 0.0000000 |

|    |            |            |            |
|----|------------|------------|------------|
| C  | 1.1782070  | 2.3433240  | 0.0000000  |
| Cl | -0.2105130 | 3.3906370  | 0.0000000  |
| C  | 0.9975280  | 0.9618850  | 0.0000000  |
| C  | 2.1383660  | 0.1654450  | 0.0000000  |
| Cl | 1.9467870  | -1.5799460 | 0.0000000  |
| C  | 3.4394540  | 0.6793800  | 0.0000000  |
| C  | 3.5614480  | 2.0707610  | 0.0000000  |
| C  | 4.6523360  | -0.2107750 | 0.0000000  |
| H  | 0.0000000  | 0.5264720  | 0.0000000  |
| H  | 4.5564430  | 2.5086290  | 0.0000000  |
| H  | 5.5654220  | 0.3895410  | 0.0000000  |
| H  | 4.6654880  | -0.8614430 | 0.8807510  |
| H  | 4.6654880  | -0.8614430 | -0.8807510 |
| H  | 2.5636950  | 3.9855570  | 0.0000000  |
| O  | -2.4819330 | 0.9308110  | 0.0000000  |
| H  | -3.7993460 | -4.0014300 | 0.0000000  |
| H  | -5.5296520 | -2.1716620 | 0.0000000  |
| H  | -4.7636380 | 0.0773280  | 0.0000000  |

|    |            |            |            |
|----|------------|------------|------------|
| 31 |            |            |            |
| LG |            |            |            |
| N  | -0.2320410 | -2.1275570 | 0.0000000  |
| C  | -0.6576050 | -3.4291320 | 0.0000000  |
| N  | 0.1506630  | -4.4586870 | 0.0000000  |
| C  | 1.4554460  | -4.0867640 | 0.0000000  |
| C  | 2.0086170  | -2.8115710 | 0.0000000  |
| C  | 1.1181930  | -1.6828440 | 0.0000000  |
| N  | 3.3850270  | -2.8678850 | 0.0000000  |
| C  | 3.6590980  | -4.1408750 | 0.0000000  |
| N  | 2.5266470  | -4.9317380 | 0.0000000  |
| H  | 4.6510790  | -4.5716350 | 0.0000000  |
| C  | -2.9031410 | 3.0507950  | 0.0000000  |
| C  | -2.0491730 | 1.9561190  | 0.0000000  |
| Cl | -2.7565530 | 0.3465080  | 0.0000000  |
| C  | -0.6678790 | 2.0942160  | 0.0000000  |
| C  | -0.1509900 | 3.3876020  | 0.0000000  |
| Cl | 1.5813620  | 3.5710380  | 0.0000000  |
| C  | -0.9617470 | 4.5288580  | 0.0000000  |
| C  | -2.3441340 | 4.3252370  | 0.0000000  |
| C  | -0.3757750 | 5.9137210  | 0.0000000  |
| H  | 0.0000000  | 1.2346270  | 0.0000000  |
| H  | -3.0013630 | 5.1908790  | 0.0000000  |
| H  | -1.1678020 | 6.6663730  | 0.0000000  |
| H  | 0.2560200  | 6.0721840  | 0.8801060  |
| H  | 0.2560200  | 6.0721840  | -0.8801060 |
| H  | 2.4780670  | -5.9410220 | 0.0000000  |
| H  | -3.9787910 | 2.9105150  | 0.0000000  |
| N  | -2.0001800 | -3.6327890 | 0.0000000  |
| H  | -2.3315770 | -4.5851290 | 0.0000000  |
| H  | -2.6674790 | -2.8783530 | 0.0000000  |
| O  | 1.3501490  | -0.4872660 | 0.0000000  |
| H  | -0.9133870 | -1.3723500 | 0.0000000  |

|    |           |            |           |
|----|-----------|------------|-----------|
| 30 |           |            |           |
| LT |           |            |           |
| N  | 3.5457120 | -1.3066370 | 0.0000000 |
| C  | 2.2360400 | -0.8707540 | 0.0000000 |
| O  | 1.9324410 | 0.3084810  | 0.0000000 |
| N  | 1.3189780 | -1.8982850 | 0.0000000 |
| C  | 1.5766520 | -3.2745210 | 0.0000000 |
| O  | 0.6605470 | -4.0739730 | 0.0000000 |
| C  | 3.0007960 | -3.6359330 | 0.0000000 |
| C  | 3.9059530 | -2.6387770 | 0.0000000 |
| C  | 3.3451390 | -5.0935770 | 0.0000000 |

|    |            |            |            |
|----|------------|------------|------------|
| H  | 0.3412720  | -1.6144030 | 0.0000000  |
| H  | 4.9752200  | -2.8257800 | 0.0000000  |
| H  | 4.4286520  | -5.2394680 | 0.0000000  |
| H  | 2.9214510  | -5.5888330 | 0.8791400  |
| H  | 2.9214510  | -5.5888330 | -0.8791400 |
| H  | 4.2435470  | -0.5747020 | 0.0000000  |
| C  | -1.0998490 | 3.2533490  | 0.0000000  |
| C  | -2.1454200 | 1.1137980  | 0.0000000  |
| C  | -3.4243090 | 1.6792380  | 0.0000000  |
| C  | -3.4892860 | 3.0752660  | 0.0000000  |
| C  | -4.6701240 | 0.8362300  | 0.0000000  |
| H  | 0.0000000  | 1.3914950  | 0.0000000  |
| H  | -4.4659860 | 3.5522290  | 0.0000000  |
| H  | -5.5600840 | 1.4700520  | 0.0000000  |
| H  | -4.7074010 | 0.1867370  | -0.8808100 |
| H  | -4.7074010 | 0.1867370  | 0.8808100  |
| H  | -2.4186230 | 4.9513850  | 0.0000000  |
| C  | -0.9771660 | 1.8678540  | 0.0000000  |
| C  | -2.3462690 | 3.8688730  | 0.0000000  |
| Cl | -2.0021730 | -0.6347720 | 0.0000000  |
| Cl | 0.3408920  | 4.2327430  | 0.0000000  |

15

|    |            |            |            |
|----|------------|------------|------------|
| L  |            |            |            |
| C  | 0.5435530  | -1.3737490 | 0.0000000  |
| C  | 0.0000000  | 0.9537980  | 0.0000000  |
| C  | -1.3720070 | 0.6808000  | 0.0000000  |
| C  | -1.7449890 | -0.6662570 | 0.0000000  |
| C  | -2.3985820 | 1.7798840  | 0.0000000  |
| H  | 2.0195740  | 0.2005720  | 0.0000000  |
| H  | -2.8032140 | -0.9143140 | 0.0000000  |
| H  | -3.4078600 | 1.3616120  | 0.0000000  |
| H  | -2.2883800 | 2.4211570  | 0.8806660  |
| H  | -2.2883800 | 2.4211570  | -0.8806660 |
| H  | -1.1208900 | -2.7348910 | 0.0000000  |
| C1 | 0.5461750  | 2.6127430  | 0.0000000  |
| C1 | 1.7354910  | -2.6440790 | 0.0000000  |
| C  | 0.9641460  | -0.0489140 | 0.0000000  |
| C  | -0.8086520 | -1.6959910 | 0.0000000  |



|       |            |            |            |
|-------|------------|------------|------------|
| 30    |            |            |            |
| 23C1A |            |            |            |
| N     | -0.0393290 | -2.0133890 | 0.0000000  |
| C     | -1.2487180 | -2.5951160 | 0.0000000  |
| N     | -1.5449030 | -3.8908920 | 0.0000000  |
| C     | -0.4376780 | -4.6420260 | 0.0000000  |
| C     | 0.8799170  | -4.1907090 | 0.0000000  |
| C     | 1.0487270  | -2.7912790 | 0.0000000  |
| N     | 2.2683940  | -2.2156180 | 0.0000000  |
| N     | 1.7756450  | -5.2417950 | 0.0000000  |
| C     | 1.0145490  | -6.3029730 | 0.0000000  |
| N     | -0.3298540 | -6.0110090 | 0.0000000  |
| H     | -2.0916590 | -1.9081790 | 0.0000000  |
| H     | 1.3708510  | -7.3245540 | 0.0000000  |
| H     | 2.3373050  | -1.2085610 | 0.0000000  |
| H     | 3.1018230  | -2.7838060 | 0.0000000  |
| C     | -1.2621800 | 3.4654890  | 0.0000000  |
| C     | 1.1490010  | 3.4886550  | 0.0000000  |
| C     | 1.1627820  | 4.8846700  | 0.0000000  |
| C     | -0.0599500 | 5.5580390  | 0.0000000  |
| C     | 2.4740790  | 5.6292640  | 0.0000000  |
| H     | -0.0781710 | 6.6446250  | 0.0000000  |
| H     | 2.3128660  | 6.7104090  | 0.0000000  |
| H     | 3.0696590  | 5.3763810  | 0.8834080  |
| H     | 3.0696590  | 5.3763810  | -0.8834080 |
| H     | -1.1005010 | -6.6646400 | 0.0000000  |
| H     | -2.2111870 | 5.3827950  | 0.0000000  |
| Cl    | -2.7792370 | 2.6213690  | 0.0000000  |
| C     | -0.0466210 | 2.7750030  | 0.0000000  |
| C     | -1.2618010 | 4.8569150  | 0.0000000  |
| H     | 2.0840750  | 2.9341960  | 0.0000000  |
| Cl    | 0.0000000  | 1.0408820  | 0.0000000  |

|       |            |            |           |
|-------|------------|------------|-----------|
| 28    |            |            |           |
| 23C1C |            |            |           |
| N     | -1.0793210 | -2.5781110 | 0.0000000 |
| C     | -2.3910280 | -2.9712350 | 0.0000000 |
| N     | -2.6286210 | -4.3712750 | 0.0000000 |
| C     | -1.6395540 | -5.2945720 | 0.0000000 |
| C     | -0.3432320 | -4.9006460 | 0.0000000 |
| C     | -0.1181640 | -3.4755900 | 0.0000000 |
| N     | 1.1544110  | -3.0157390 | 0.0000000 |
| H     | 1.3011290  | -2.0148110 | 0.0000000 |
| H     | 1.9475860  | -3.6360270 | 0.0000000 |
| C     | 0.8008640  | 4.2915130  | 0.0000000 |

|    |            |            |           |
|----|------------|------------|-----------|
| C  | 0.1085070  | 3.0841830  | 0.0000000 |
| Cl | -1.6248740 | 3.1007300  | 0.0000000 |
| C  | 0.8223560  | 1.8817550  | 0.0000000 |
| C  | 2.2144630  | 1.9085730  | 0.0000000 |
| C  | 2.9197490  | 3.1133510  | 0.0000000 |
| C  | 2.1921790  | 4.3044580  | 0.0000000 |
| C  | 4.4277680  | 3.1092180  | 0.0000000 |
| H  | 2.7154340  | 5.2569390  | 0.0000000 |
| H  | 4.8239440  | 4.1280170  | 0.0000000 |
| H  | 4.8199920  | 2.5947460  | 0.8835670 |
| H  | 0.2372870  | 5.2190210  | 0.0000000 |
| O  | -3.3508190 | -2.2248410 | 0.0000000 |
| H  | 0.4703020  | -5.6143400 | 0.0000000 |
| H  | -1.9435200 | -6.3363410 | 0.0000000 |
| H  | -3.6047150 | -4.6393180 | 0.0000000 |
| H  | 2.7532420  | 0.9642150  | 0.0000000 |
| Cl | 0.0000000  | 0.3540760  | 0.0000000 |

|       |            |            |            |
|-------|------------|------------|------------|
| 31    |            |            |            |
| 23ClG |            |            |            |
| N     | -0.5093970 | 1.8203520  | 0.0000000  |
| C     | 0.1780840  | 3.0048760  | 0.0000000  |
| N     | -0.3954800 | 4.1821120  | 0.0000000  |
| C     | -1.7492240 | 4.0933270  | 0.0000000  |
| C     | -2.5575220 | 2.9637840  | 0.0000000  |
| C     | -1.9270670 | 1.6699210  | 0.0000000  |
| N     | -3.8914710 | 3.3085310  | 0.0000000  |
| C     | -3.8919430 | 4.6108230  | 0.0000000  |
| N     | -2.6185090 | 5.1455060  | 0.0000000  |
| H     | -4.7711550 | 5.2405850  | 0.0000000  |
| C     | 3.2178130  | -3.2422340 | 0.0000000  |
| C     | 2.1876890  | -2.3087120 | 0.0000000  |
| Cl    | 2.6023140  | -0.6132030 | 0.0000000  |
| C     | 0.8572880  | -2.7317360 | 0.0000000  |
| C     | 0.5769900  | -4.0957170 | 0.0000000  |
| C     | 1.5981800  | -5.0476160 | 0.0000000  |
| C     | 2.9213400  | -4.6016240 | 0.0000000  |
| C     | 1.2614170  | -6.5170300 | 0.0000000  |
| H     | 3.7346170  | -5.3221280 | 0.0000000  |
| H     | 2.1668760  | -7.1291200 | 0.0000000  |
| H     | -2.3579960 | 6.1216980  | 0.0000000  |
| H     | 4.2466190  | -2.8969710 | 0.0000000  |
| N     | 1.5331430  | 2.9253900  | 0.0000000  |
| H     | 2.0553880  | 3.7877290  | 0.0000000  |
| H     | 2.0251260  | 2.0468270  | 0.0000000  |
| O     | -2.4116230 | 0.5547270  | 0.0000000  |
| H     | 0.0000000  | 0.9396140  | 0.0000000  |
| H     | -0.4640040 | -4.4084690 | 0.0000000  |
| Cl    | -0.4583360 | -1.6051720 | 0.0000000  |
| H     | 0.6718000  | -6.7834170 | 0.8831740  |
| H     | 0.6718000  | -6.7834170 | -0.8831740 |
| 30    |            |            |            |
| 23ClT |            |            |            |
| N     | -3.4998840 | -3.0517940 | 0.0000000  |
| C     | -2.1319770 | -2.8396230 | 0.0000000  |
| O     | -1.3209290 | -3.7414390 | 0.0000000  |
| N     | -1.7937300 | -1.4989090 | 0.0000000  |
| C     | -2.6566570 | -0.4034410 | 0.0000000  |
| O     | -2.2142300 | 0.7345790  | 0.0000000  |
| C     | -4.0853840 | -0.7335150 | 0.0000000  |
| C     | -4.4302620 | -2.0364180 | 0.0000000  |
| C     | -5.0630330 | 0.4014730  | 0.0000000  |

|      |            |            |            |
|------|------------|------------|------------|
| H    | -0.7935030 | -1.3031150 | 0.0000000  |
| H    | -5.4663590 | -2.3605060 | 0.0000000  |
| H    | -6.0914600 | 0.0304110  | 0.0000000  |
| H    | -4.9174910 | 1.0361600  | 0.8796080  |
| H    | -4.9174910 | 1.0361600  | -0.8796080 |
| H    | -3.7837580 | -4.0225570 | 0.0000000  |
| C    | 3.4006210  | 1.0614700  | 0.0000000  |
| C    | 1.0224110  | 1.5031390  | 0.0000000  |
| C    | 1.2542070  | 2.8773430  | 0.0000000  |
| C    | 2.5778130  | 3.3304040  | 0.0000000  |
| C    | 0.0974700  | 3.8441510  | 0.0000000  |
| H    | 2.7822260  | 4.3984220  | 0.0000000  |
| H    | 0.1299550  | 4.4911030  | 0.8832210  |
| H    | 0.1299550  | 4.4911030  | -0.8832210 |
| H    | -0.8568360 | 3.3112480  | 0.0000000  |
| H    | 4.6662840  | 2.7881520  | 0.0000000  |
| C    | 2.0849340  | 0.6020260  | 0.0000000  |
| C    | 3.6398290  | 2.4354640  | 0.0000000  |
| Cl   | 4.7470010  | -0.0339820 | 0.0000000  |
| Cl   | 1.7350710  | -1.1056800 | 0.0000000  |
| H    | 0.0000000  | 1.1326400  | 0.0000000  |
| 15   |            |            |            |
| 23Cl |            |            |            |
| C    | 0.8420650  | -0.4399250 | 0.0000000  |
| C    | -1.3811840 | 0.5038890  | 0.0000000  |
| C    | -1.9500140 | -0.7711500 | 0.0000000  |
| C    | -1.0974350 | -1.8764390 | 0.0000000  |
| C    | -3.4495260 | -0.9302280 | 0.0000000  |
| H    | -1.5148900 | -2.8796810 | 0.0000000  |
| H    | -3.7334990 | -1.9857050 | 0.0000000  |
| H    | -3.8942810 | -0.4602070 | 0.8832920  |
| H    | -3.8942810 | -0.4602070 | -0.8832920 |
| H    | 0.9440740  | -2.5768190 | 0.0000000  |
| Cl   | 2.5679880  | -0.2686220 | 0.0000000  |
| C    | 0.0000000  | 0.6746530  | 0.0000000  |
| C    | 0.2847210  | -1.7147860 | 0.0000000  |
| Cl   | 0.6447130  | 2.2862470  | 0.0000000  |
| H    | -2.0147920 | 1.3869020  | 0.0000000  |

**Water (CPCM)**

30

FA

|   |            |            |            |
|---|------------|------------|------------|
| N | -1.1635850 | -0.7150870 | 0.0000000  |
| C | -2.5059840 | -0.7240270 | 0.0000000  |
| N | -3.3279920 | -1.7659490 | 0.0000000  |
| C | -2.6539220 | -2.9264010 | 0.0000000  |
| C | -1.2705590 | -3.0787120 | 0.0000000  |
| C | -0.5113050 | -1.8898760 | 0.0000000  |
| N | 0.8308030  | -1.9045890 | 0.0000000  |
| N | -0.9137150 | -4.4113820 | 0.0000000  |
| C | -2.0611020 | -5.0441090 | 0.0000000  |
| N | -3.1432990 | -4.2044630 | 0.0000000  |
| H | -2.9746090 | 0.2564940  | 0.0000000  |
| H | -2.1845140 | -6.1169030 | 0.0000000  |
| H | 1.3581130  | -1.0410080 | 0.0000000  |
| H | 1.3234100  | -2.7851750 | 0.0000000  |
| C | 0.2275870  | 3.3788030  | 0.0000000  |
| C | 2.0492610  | 1.8989160  | 0.0000000  |
| C | 2.9782260  | 2.9325030  | 0.0000000  |
| C | 2.4556510  | 4.2270660  | 0.0000000  |
| C | 4.4520570  | 2.6447950  | 0.0000000  |
| H | 0.0000000  | 1.2135580  | 0.0000000  |
| H | 3.1447390  | 5.0652170  | 0.0000000  |
| H | 5.0139030  | 3.5796190  | 0.0000000  |
| H | 4.7402900  | 2.0659600  | 0.8811850  |
| H | 4.7402900  | 2.0659600  | -0.8811850 |
| H | -4.1169380 | -4.4774090 | 0.0000000  |
| H | 0.6792870  | 5.4727360  | 0.0000000  |
| F | 2.5273000  | 0.6259700  | 0.0000000  |
| F | -1.1063540 | 3.5951280  | 0.0000000  |
| C | 0.6766040  | 2.0669220  | 0.0000000  |
| C | 1.0821560  | 4.4676810  | 0.0000000  |

28

FC

|   |            |            |           |
|---|------------|------------|-----------|
| N | -1.7211010 | -0.7826590 | 0.0000000 |
| C | -2.7768400 | 0.0709900  | 0.0000000 |
| N | -4.0585330 | -0.4849200 | 0.0000000 |
| C | -4.2801800 | -1.8228900 | 0.0000000 |
| C | -3.2362130 | -2.6859200 | 0.0000000 |
| C | -1.9262100 | -2.0956970 | 0.0000000 |
| N | -0.8408450 | -2.8829560 | 0.0000000 |
| H | 0.0759970  | -2.4537240 | 0.0000000 |

|   |            |            |            |
|---|------------|------------|------------|
| H | -0.9171260 | -3.8880540 | 0.0000000  |
| C | 2.7721110  | 2.7684670  | 0.0000000  |
| C | 1.4432730  | 2.3809410  | 0.0000000  |
| F | 0.4867650  | 3.3362390  | 0.0000000  |
| C | 1.0432990  | 1.0534500  | 0.0000000  |
| C | 2.0593440  | 0.1145620  | 0.0000000  |
| F | 1.7138860  | -1.2000110 | 0.0000000  |
| C | 3.4169270  | 0.4161210  | 0.0000000  |
| C | 3.7474380  | 1.7724400  | 0.0000000  |
| C | 4.4449920  | -0.6788330 | 0.0000000  |
| H | 0.0000000  | 0.7497330  | 0.0000000  |
| H | 4.7956280  | 2.0518420  | 0.0000000  |
| H | 5.4498940  | -0.2537340 | 0.0000000  |
| H | 4.3355850  | -1.3170140 | 0.8795160  |
| H | 4.3355850  | -1.3170140 | -0.8795160 |
| H | 3.0313160  | 3.8193910  | 0.0000000  |
| O | -2.6611980 | 1.3004090  | 0.0000000  |
| H | -3.3794760 | -3.7567590 | 0.0000000  |
| H | -5.3149920 | -2.1388280 | 0.0000000  |
| H | -4.8329940 | 0.1667930  | 0.0000000  |

|    |            |            |            |
|----|------------|------------|------------|
| 31 |            |            |            |
| FG |            |            |            |
| N  | -0.9735760 | 1.2298470  | 0.0000000  |
| C  | -1.2535330 | 2.5733620  | 0.0000000  |
| N  | -2.4766250 | 3.0563710  | 0.0000000  |
| C  | -3.4158830 | 2.0820060  | 0.0000000  |
| C  | -3.2437140 | 0.7009320  | 0.0000000  |
| C  | -1.9105300 | 0.1851090  | 0.0000000  |
| N  | -4.4606810 | 0.0506720  | 0.0000000  |
| C  | -5.3427820 | 1.0148910  | 0.0000000  |
| N  | -4.7669680 | 2.2621140  | 0.0000000  |
| H  | -6.4148830 | 0.8891640  | 0.0000000  |
| C  | 3.9768150  | -0.1996600 | 0.0000000  |
| C  | 2.5952770  | -0.2106600 | 0.0000000  |
| F  | 1.9372050  | 0.9846060  | 0.0000000  |
| C  | 1.8377270  | -1.3704940 | 0.0000000  |
| C  | 2.5524920  | -2.5568740 | 0.0000000  |
| F  | 1.8581190  | -3.7150770 | 0.0000000  |
| C  | 3.9419880  | -2.6385530 | 0.0000000  |
| C  | 4.6368870  | -1.4284460 | 0.0000000  |
| C  | 4.6208770  | -3.9788380 | 0.0000000  |
| H  | 0.7497440  | -1.3628480 | 0.0000000  |
| H  | 5.7211760  | -1.4491320 | 0.0000000  |
| H  | 5.7042490  | -3.8547430 | 0.0000000  |
| H  | 4.3359640  | -4.5607590 | 0.8801990  |
| H  | 4.3359640  | -4.5607590 | -0.8801990 |
| H  | -5.2513370 | 3.1501850  | 0.0000000  |
| H  | 4.5164820  | 0.7389250  | 0.0000000  |
| N  | -0.1913220 | 3.4011760  | 0.0000000  |
| H  | -0.3516320 | 4.3967640  | 0.0000000  |
| H  | 0.7582190  | 3.0590370  | 0.0000000  |
| O  | -1.5189230 | -0.9810660 | 0.0000000  |
| H  | 0.0000000  | 0.9390240  | 0.0000000  |

|    |            |            |           |
|----|------------|------------|-----------|
| 30 |            |            |           |
| FT |            |            |           |
| N  | -3.0352040 | 1.9940750  | 0.0000000 |
| C  | -2.0378260 | 1.0550740  | 0.0000000 |
| O  | -2.2515490 | -0.1511200 | 0.0000000 |
| N  | -0.7705490 | 1.5908510  | 0.0000000 |
| C  | -0.4297110 | 2.9423090  | 0.0000000 |
| O  | 0.7487060  | 3.2766670  | 0.0000000 |
| C  | -1.5555560 | 3.8687370  | 0.0000000 |
| C  | -2.8004790 | 3.3488970  | 0.0000000 |
| C  | -1.2661470 | 5.3360080  | 0.0000000 |

|   |            |            |            |
|---|------------|------------|------------|
| H | 0.0000000  | 0.9240900  | 0.0000000  |
| H | -3.6874090 | 3.9697630  | 0.0000000  |
| H | -2.1966240 | 5.9052580  | 0.0000000  |
| H | -0.6824120 | 5.6158220  | 0.8809150  |
| H | -0.6824120 | 5.6158220  | -0.8809150 |
| H | -3.9820260 | 1.6374710  | 0.0000000  |
| C | 0.1948820  | -3.5671690 | 0.0000000  |
| C | 1.5292090  | -1.6337040 | 0.0000000  |
| C | 2.7102670  | -2.3668780 | 0.0000000  |
| C | 2.5701750  | -3.7560910 | 0.0000000  |
| C | 4.0475790  | -1.6827640 | 0.0000000  |
| H | -0.6309840 | -1.5595930 | 0.0000000  |
| H | 3.4667200  | -4.3663450 | 0.0000000  |
| H | 4.8486460  | -2.4239550 | 0.0000000  |
| H | 4.1636700  | -1.0461560 | -0.8800960 |
| H | 4.1636700  | -1.0461560 | 0.8800960  |
| H | 1.2161900  | -5.4507680 | 0.0000000  |
| C | 0.2595220  | -2.1825020 | 0.0000000  |
| C | 1.3197050  | -4.3732370 | 0.0000000  |
| F | 1.6271440  | -0.2757090 | 0.0000000  |
| F | -1.0253360 | -4.1472020 | 0.0000000  |

|    |            |            |            |
|----|------------|------------|------------|
| 30 |            |            |            |
| TA |            |            |            |
| N  | -0.7514250 | -0.7237240 | 0.0000000  |
| C  | -2.0926510 | -0.7974700 | 0.0000000  |
| N  | -2.8502930 | -1.8845640 | 0.0000000  |
| C  | -2.1057420 | -3.0041490 | 0.0000000  |
| C  | -0.7150080 | -3.0797770 | 0.0000000  |
| C  | -0.0179990 | -1.8526170 | 0.0000000  |
| N  | 1.3172710  | -1.7699900 | 0.0000000  |
| N  | -0.2849630 | -4.3896050 | 0.0000000  |
| C  | -1.3944190 | -5.0862310 | 0.0000000  |
| N  | -2.5211880 | -4.3071430 | 0.0000000  |
| H  | -2.5999420 | 0.1647380  | 0.0000000  |
| H  | -1.4573810 | -6.1637870 | 0.0000000  |
| H  | 1.7827840  | -0.8596110 | 0.0000000  |
| H  | 1.8643510  | -2.6178820 | 0.0000000  |
| N  | 0.0997570  | 4.1355230  | 0.0000000  |
| C  | -0.4812640 | 2.8911160  | 0.0000000  |
| O  | -1.6938560 | 2.7134470  | 0.0000000  |
| N  | 0.4188840  | 1.8557750  | 0.0000000  |
| C  | 1.7961020  | 1.9533770  | 0.0000000  |
| O  | 2.4862240  | 0.9286390  | 0.0000000  |
| C  | 2.3395340  | 3.3041670  | 0.0000000  |
| C  | 1.4590740  | 4.3289570  | 0.0000000  |
| C  | 3.8253150  | 3.4792580  | 0.0000000  |
| H  | 0.0000000  | 0.8991090  | 0.0000000  |
| H  | 1.7784400  | 5.3640230  | 0.0000000  |
| H  | 4.0858370  | 4.5385470  | 0.0000000  |
| H  | 4.2704740  | 3.0083810  | 0.8800830  |
| H  | 4.2704740  | 3.0083810  | -0.8800830 |
| H  | -3.4766780 | -4.6386410 | 0.0000000  |
| H  | -0.5312600 | 4.9263660  | 0.0000000  |

|    |            |            |           |
|----|------------|------------|-----------|
| 28 |            |            |           |
| TC |            |            |           |
| N  | -1.5929670 | -0.8265070 | 0.0000000 |
| C  | -2.7987690 | -0.1940120 | 0.0000000 |
| N  | -3.9502080 | -0.9849970 | 0.0000000 |
| C  | -3.9161120 | -2.3411000 | 0.0000000 |
| C  | -2.7266670 | -2.9844940 | 0.0000000 |
| C  | -1.5467420 | -2.1622580 | 0.0000000 |
| N  | -0.3462330 | -2.7463030 | 0.0000000 |
| H  | 0.5004530  | -2.1726150 | 0.0000000 |
| H  | -0.2684690 | -3.7522690 | 0.0000000 |
| N  | 2.1814490  | 2.9209630  | 0.0000000 |

|   |            |            |            |
|---|------------|------------|------------|
| C | 0.9235760  | 2.3654140  | 0.0000000  |
| O | -0.0921770 | 3.0435870  | 0.0000000  |
| N | 0.9199930  | 0.9852340  | 0.0000000  |
| C | 2.0417630  | 0.1715550  | 0.0000000  |
| O | 1.9241360  | -1.0554990 | 0.0000000  |
| C | 3.3344300  | 0.8390570  | 0.0000000  |
| C | 3.3407750  | 2.1884350  | 0.0000000  |
| C | 4.5652850  | -0.0121060 | 0.0000000  |
| H | 0.0000000  | 0.5129490  | 0.0000000  |
| H | 4.2548620  | 2.7695300  | 0.0000000  |
| H | 5.4614940  | 0.6094470  | 0.0000000  |
| H | 4.5864140  | -0.6593880 | 0.8798300  |
| H | 4.5864140  | -0.6593880 | -0.8798300 |
| H | 2.2154670  | 3.9323190  | 0.0000000  |
| O | -2.9272320 | 1.0318220  | 0.0000000  |
| H | -2.6590830 | -4.0623410 | 0.0000000  |
| H | -4.8719420 | -2.8497660 | 0.0000000  |
| H | -4.8328960 | -0.4894300 | 0.0000000  |

|    |            |            |            |
|----|------------|------------|------------|
| 31 |            |            |            |
| TG |            |            |            |
| N  | -1.0321300 | 1.2173730  | 0.0000000  |
| C  | -1.6753580 | 2.4259410  | 0.0000000  |
| N  | -2.9862810 | 2.5553280  | 0.0000000  |
| C  | -3.6172110 | 1.3606020  | 0.0000000  |
| C  | -3.0645090 | 0.0812190  | 0.0000000  |
| C  | -1.6429740 | -0.0326600 | 0.0000000  |
| N  | -4.0516590 | -0.8839190 | 0.0000000  |
| C  | -5.1675580 | -0.2047070 | 0.0000000  |
| N  | -4.9644520 | 1.1547850  | 0.0000000  |
| H  | -6.1626300 | -0.6241500 | 0.0000000  |
| N  | 3.7982070  | 0.3785420  | 0.0000000  |
| C  | 2.4360690  | 0.3163480  | 0.0000000  |
| O  | 1.7366420  | 1.3357080  | 0.0000000  |
| N  | 1.9167690  | -0.9485900 | 0.0000000  |
| C  | 2.6464570  | -2.1377140 | 0.0000000  |
| O  | 2.0618390  | -3.2141880 | 0.0000000  |
| C  | 4.0983770  | -1.9872310 | 0.0000000  |
| C  | 4.6037600  | -0.7372500 | 0.0000000  |
| C  | 4.9391340  | -3.2241910 | 0.0000000  |
| H  | 0.8846330  | -1.0285110 | 0.0000000  |
| H  | 5.6678300  | -0.5364830 | 0.0000000  |
| H  | 5.9988410  | -2.9660450 | 0.0000000  |
| H  | 4.7263490  | -3.8364230 | 0.8799420  |
| H  | 4.7263490  | -3.8364230 | -0.8799420 |
| H  | -5.6788270 | 1.8713650  | 0.0000000  |
| H  | 4.2041750  | 1.3061640  | 0.0000000  |
| N  | -0.8774630 | 3.5112580  | 0.0000000  |
| H  | -1.2971360 | 4.4280130  | 0.0000000  |
| H  | 0.1294330  | 3.4312710  | 0.0000000  |
| O  | -0.9431150 | -1.0564580 | 0.0000000  |
| H  | 0.0000000  | 1.2151460  | 0.0000000  |
| 30 |            |            |            |
| TT |            |            |            |
| N  | -3.2243240 | 1.1212870  | 0.0000000  |
| C  | -1.9880640 | 0.5409760  | 0.0000000  |
| O  | -1.8347970 | -0.6823830 | 0.0000000  |
| N  | -0.9423060 | 1.4231650  | 0.0000000  |
| C  | -1.0323400 | 2.8133720  | 0.0000000  |
| O  | -0.0136770 | 3.4945160  | 0.0000000  |
| C  | -2.3875090 | 3.3559680  | 0.0000000  |
| C  | -3.4157530 | 2.4834530  | 0.0000000  |
| C  | -2.5529910 | 4.8425050  | 0.0000000  |

|    |            |            |            |
|----|------------|------------|------------|
| H  | 0.0000000  | 1.0027940  | 0.0000000  |
| H  | -4.4501230 | 2.8040930  | 0.0000000  |
| H  | -3.6103660 | 5.1102450  | 0.0000000  |
| H  | -2.0777560 | 5.2831610  | 0.8799940  |
| H  | -2.0777560 | 5.2831610  | -0.8799940 |
| H  | -4.0152740 | 0.4901280  | 0.0000000  |
| N  | 2.0298040  | -3.8541380 | 0.0000000  |
| C  | 0.7545210  | -3.3446850 | 0.0000000  |
| O  | -0.2469390 | -4.0465660 | 0.0000000  |
| N  | 0.7064910  | -1.9687870 | 0.0000000  |
| C  | 1.7866770  | -1.1063980 | 0.0000000  |
| O  | 1.6032240  | 0.1152250  | 0.0000000  |
| C  | 3.1034740  | -1.7234080 | 0.0000000  |
| C  | 3.1585300  | -3.0731560 | 0.0000000  |
| C  | 4.3042890  | -0.8310240 | 0.0000000  |
| H  | -0.2330020 | -1.5437000 | 0.0000000  |
| H  | 4.0942440  | -3.6193410 | 0.0000000  |
| H  | 5.2209160  | -1.4219210 | 0.0000000  |
| H  | 4.3035370  | -0.1838590 | -0.8801720 |
| H  | 4.3035370  | -0.1838590 | 0.8801720  |
| H  | 2.1068950  | -4.8635480 | 0.0000000  |
| 15 |            |            |            |
| A  |            |            |            |
| N  | 1.6650980  | -1.1334900 | 0.0000000  |
| C  | 0.6629780  | -2.0255900 | 0.0000000  |
| N  | -0.6466380 | -1.8060870 | 0.0000000  |
| C  | -0.9244070 | -0.4936010 | 0.0000000  |
| C  | 0.0000000  | 0.5474310  | 0.0000000  |
| C  | 1.3597400  | 0.1736610  | 0.0000000  |
| N  | 2.3511810  | 1.0798270  | 0.0000000  |
| N  | -0.6294520 | 1.7753490  | 0.0000000  |
| C  | -1.9046420 | 1.4750390  | 0.0000000  |
| N  | -2.1444830 | 0.1265660  | 0.0000000  |
| H  | 0.9728740  | -3.0653350 | 0.0000000  |
| H  | -2.7148530 | 2.1892560  | 0.0000000  |
| H  | 3.3129290  | 0.7739460  | 0.0000000  |
| H  | 2.1478110  | 2.0679790  | 0.0000000  |
| H  | -3.0507300 | -0.3226450 | 0.0000000  |

|    |            |            |            |
|----|------------|------------|------------|
| 13 |            |            |            |
| C  |            |            |            |
| N  | 0.0000000  | 1.0510440  | 0.0000000  |
| C  | -1.2081490 | 0.4283840  | 0.0000000  |
| N  | -1.2158660 | -0.9694280 | 0.0000000  |
| C  | -0.0827690 | -1.7144320 | 0.0000000  |
| C  | 1.1273890  | -1.1066500 | 0.0000000  |
| C  | 1.1150860  | 0.3294890  | 0.0000000  |
| N  | 2.2800820  | 0.9956710  | 0.0000000  |
| H  | 2.2754230  | 2.0052200  | 0.0000000  |
| H  | 3.1667400  | 0.5157450  | 0.0000000  |
| O  | -2.2889950 | 1.0235530  | 0.0000000  |
| H  | 2.0494560  | -1.6696060 | 0.0000000  |
| H  | -0.2126290 | -2.7886700 | 0.0000000  |
| H  | -2.1258850 | -1.4128690 | 0.0000000  |
| 15 |            |            |            |
| F  |            |            |            |
| C  | 1.2590890  | -0.9960940 | 0.0000000  |
| C  | 0.0000000  | 0.9951230  | 0.0000000  |
| C  | -1.2066010 | 0.3024500  | 0.0000000  |
| C  | -1.1213880 | -1.0904140 | 0.0000000  |
| C  | -2.5144610 | 1.0413760  | 0.0000000  |
| H  | 2.1578180  | 0.9710520  | 0.0000000  |
| H  | -2.0400820 | -1.6669280 | 0.0000000  |
| H  | -3.3452550 | 0.3342770  | 0.0000000  |
| H  | -2.6037420 | 1.6823130  | 0.8800320  |
| H  | -2.6037420 | 1.6823130  | -0.8800320 |
| H  | 0.1657230  | -2.8371990 | 0.0000000  |
| F  | -0.0478310 | 2.3457930  | 0.0000000  |
| F  | 2.4564960  | -1.6211860 | 0.0000000  |
| C  | 1.2448660  | 0.3900160  | 0.0000000  |
| C  | 0.1037110  | -1.7570050 | 0.0000000  |
| 16 |            |            |            |
| G  |            |            |            |
| N  | -1.4301950 | -0.8650580 | 0.0000000  |
| C  | -0.3618190 | -1.7288710 | 0.0000000  |
| N  | 0.8900170  | -1.3257570 | 0.0000000  |
| C  | 1.0054250  | 0.0214960  | 0.0000000  |
| C  | 0.0000000  | 0.9815040  | 0.0000000  |
| C  | -1.3609520 | 0.5411860  | 0.0000000  |
| N  | 0.5331020  | 2.2545600  | 0.0000000  |
| C  | 1.8260270  | 2.0652600  | 0.0000000  |
| N  | 2.1672360  | 0.7341920  | 0.0000000  |

|    |            |            |            |
|----|------------|------------|------------|
| H  | 2.5791570  | 2.8396910  | 0.0000000  |
| H  | 3.1027890  | 0.3499540  | 0.0000000  |
| N  | -0.6390730 | -3.0460650 | 0.0000000  |
| H  | 0.1325290  | -3.6960280 | 0.0000000  |
| H  | -1.5781920 | -3.4132750 | 0.0000000  |
| O  | -2.3953050 | 1.2015100  | 0.0000000  |
| H  | -2.3735440 | -1.2389710 | 0.0000000  |
| 15 |            |            |            |
| T  |            |            |            |
| N  | 0.1553230  | -1.6604050 | 0.0000000  |
| C  | 1.3454480  | -0.9789580 | 0.0000000  |
| O  | 2.4370330  | -1.5284980 | 0.0000000  |
| N  | 1.1936950  | 0.3910690  | 0.0000000  |
| C  | 0.0000000  | 1.1114640  | 0.0000000  |
| O  | 0.0231750  | 2.3361750  | 0.0000000  |
| C  | -1.2120480 | 0.3000320  | 0.0000000  |
| C  | -1.0724340 | -1.0418020 | 0.0000000  |
| C  | -2.5358970 | 0.9976890  | 0.0000000  |
| H  | 2.0533710  | 0.9300960  | 0.0000000  |
| H  | -1.9233960 | -1.7113450 | 0.0000000  |
| H  | -3.3497310 | 0.2704500  | 0.0000000  |
| H  | -2.6370930 | 1.6371400  | 0.8800760  |
| H  | -2.6370930 | 1.6371400  | -0.8800760 |
| H  | 0.2187480  | -2.6700970 | 0.0000000  |

|    |            |            |            |
|----|------------|------------|------------|
| 30 |            |            |            |
| LA |            |            |            |
| N  | -0.6276780 | -1.2954290 | 0.0000000  |
| C  | -1.9373280 | -1.5871110 | 0.0000000  |
| N  | -2.5201580 | -2.7801350 | 0.0000000  |
| C  | -1.6138910 | -3.7702400 | 0.0000000  |
| C  | -0.2285930 | -3.6260900 | 0.0000000  |
| C  | 0.2604550  | -2.3031690 | 0.0000000  |
| N  | 1.5727140  | -2.0193680 | 0.0000000  |
| N  | 0.4021080  | -4.8532890 | 0.0000000  |
| C  | -0.5847840 | -5.7146870 | 0.0000000  |
| N  | -1.8200110 | -5.1233810 | 0.0000000  |
| H  | -2.5978370 | -0.7246150 | 0.0000000  |
| H  | -0.4761880 | -6.7889220 | 0.0000000  |
| H  | 1.8848570  | -1.0567600 | 0.0000000  |
| H  | 2.2593950  | -2.7590260 | 0.0000000  |
| C  | -0.8962520 | 2.8296520  | 0.0000000  |
| C  | 1.4532360  | 2.4725320  | 0.0000000  |
| C  | 1.7139870  | 3.8452750  | 0.0000000  |
| C  | 0.6030390  | 4.6930230  | 0.0000000  |
| C  | 3.1147790  | 4.3876880  | 0.0000000  |
| H  | 0.0000000  | 0.8660030  | 0.0000000  |
| H  | 0.7665550  | 5.7656230  | 0.0000000  |
| H  | 3.0993050  | 5.4778430  | 0.0000000  |
| H  | 3.6657710  | 4.0443320  | 0.8800160  |
| H  | 3.6657710  | 4.0443320  | -0.8800160 |
| H  | -2.7137780 | -5.5971550 | 0.0000000  |
| H  | -1.5480900 | 4.8800390  | 0.0000000  |
| Cl | 2.8019860  | 1.3557020  | 0.0000000  |
| Cl | -2.5183350 | 2.1806450  | 0.0000000  |
| C  | 0.1703240  | 1.9403600  | 0.0000000  |
| C  | -0.7010790 | 4.2047050  | 0.0000000  |

|    |            |            |           |
|----|------------|------------|-----------|
| 28 |            |            |           |
| LC |            |            |           |
| N  | -1.8032500 | -1.2275430 | 0.0000000 |
| C  | -2.6337660 | -0.1518980 | 0.0000000 |
| N  | -4.0103610 | -0.3898510 | 0.0000000 |
| C  | -4.5437580 | -1.6368780 | 0.0000000 |
| C  | -3.7286800 | -2.7179080 | 0.0000000 |
| C  | -2.3168400 | -2.4518910 | 0.0000000 |
| N  | -1.4577380 | -3.4832190 | 0.0000000 |
| H  | -0.4647480 | -3.2971190 | 0.0000000 |
| H  | -1.7787530 | -4.4392180 | 0.0000000 |
| C  | 2.6219710  | 2.7730910  | 0.0000000 |

|    |            |            |            |
|----|------------|------------|------------|
| C  | 1.3154320  | 2.3005070  | 0.0000000  |
| Cl | -0.0012860 | 3.4469680  | 0.0000000  |
| C  | 1.0288700  | 0.9388320  | 0.0000000  |
| C  | 2.1044690  | 0.0575130  | 0.0000000  |
| Cl | 1.7691470  | -1.6614050 | 0.0000000  |
| C  | 3.4397700  | 0.4750750  | 0.0000000  |
| C  | 3.6664740  | 1.8535520  | 0.0000000  |
| C  | 4.5772350  | -0.5049900 | 0.0000000  |
| H  | 0.0000000  | 0.5822830  | 0.0000000  |
| H  | 4.6903360  | 2.2134070  | 0.0000000  |
| H  | 5.5333990  | 0.0197070  | 0.0000000  |
| H  | 4.5343890  | -1.1521370 | 0.8796660  |
| H  | 4.5343890  | -1.1521370 | -0.8796660 |
| H  | 2.8179450  | 3.8385750  | 0.0000000  |
| O  | -2.2330830 | 1.0156140  | 0.0000000  |
| H  | -4.1137280 | -3.7274020 | 0.0000000  |
| H  | -5.6238250 | -1.6991580 | 0.0000000  |
| H  | -4.6060030 | 0.4279820  | 0.0000000  |



|    |            |            |            |
|----|------------|------------|------------|
| 31 |            |            |            |
| LG |            |            |            |
| N  | -0.3168920 | -2.2492000 | 0.0000000  |
| C  | -0.6616990 | -3.5791810 | 0.0000000  |
| N  | 0.2218960  | -4.5541960 | 0.0000000  |
| C  | 1.4958870  | -4.1040350 | 0.0000000  |
| C  | 1.9545590  | -2.7906730 | 0.0000000  |
| C  | 0.9916420  | -1.7362090 | 0.0000000  |
| N  | 3.3339980  | -2.7494350 | 0.0000000  |
| C  | 3.6959400  | -4.0049170 | 0.0000000  |
| N  | 2.6250860  | -4.8665340 | 0.0000000  |
| H  | 4.7115410  | -4.3704500 | 0.0000000  |
| C  | -2.8880010 | 3.0872910  | 0.0000000  |
| C  | -2.0356870 | 1.9914980  | 0.0000000  |
| Cl | -2.7229520 | 0.3817610  | 0.0000000  |
| C  | -0.6546050 | 2.1330020  | 0.0000000  |
| C  | -0.1404840 | 3.4247170  | 0.0000000  |
| Cl | 1.5975660  | 3.6080180  | 0.0000000  |
| C  | -0.9470400 | 4.5667220  | 0.0000000  |
| C  | -2.3295630 | 4.3624770  | 0.0000000  |
| C  | -0.3592560 | 5.9484850  | 0.0000000  |
| H  | 0.0000000  | 1.2648930  | 0.0000000  |
| H  | -2.9820610 | 5.2291430  | 0.0000000  |
| H  | -1.1488490 | 6.7016230  | 0.0000000  |
| H  | 0.2724980  | 6.1020500  | 0.8789730  |
| H  | 0.2724980  | 6.1020500  | -0.8789730 |
| H  | 2.6647350  | -5.8768290 | 0.0000000  |
| H  | -3.9623210 | 2.9487830  | 0.0000000  |
| N  | -1.9761890 | -3.8699700 | 0.0000000  |
| H  | -2.2550450 | -4.8392730 | 0.0000000  |
| H  | -2.6948100 | -3.1632550 | 0.0000000  |
| O  | 1.1694270  | -0.5193790 | 0.0000000  |
| H  | -1.0474830 | -1.5396660 | 0.0000000  |
| 30 |            |            |            |
| LT |            |            |            |
| N  | -3.2598850 | 1.8991270  | 0.0013030  |
| C  | -2.0448110 | 1.2668830  | 0.0006800  |
| O  | -0.9746380 | 1.8625590  | 0.0009490  |
| N  | -2.1353210 | -0.1062460 | -0.0003450 |
| C  | -3.2970380 | -0.8767460 | -0.0007160 |
| O  | -3.2194820 | -2.0993070 | -0.0017100 |
| C  | -4.5432090 | -0.1182950 | 0.0001030  |
| C  | -4.4601240 | 1.2283480  | 0.0010440  |
| C  | -5.8386990 | -0.8681700 | -0.0003090 |

|    |            |            |            |
|----|------------|------------|------------|
| H  | -1.2508850 | -0.6122780 | -0.0008040 |
| H  | -5.3382750 | 1.8611140  | 0.0016770  |
| H  | -6.6799460 | -0.1731530 | 0.0001680  |
| H  | -5.9154160 | -1.5099620 | -0.8810220 |
| H  | -5.9153500 | -1.5111160 | 0.8795660  |
| H  | -3.2390420 | 2.9107160  | 0.0021100  |
| C  | 3.0300050  | 1.2459990  | -0.0006050 |
| C  | 2.1508970  | -0.9635130 | 0.0003680  |
| C  | 3.4282010  | -1.5300690 | 0.0004870  |
| C  | 4.5049400  | -0.6390510 | 0.0000640  |
| C  | 3.6351490  | -3.0173020 | 0.0009960  |
| H  | 0.9127860  | 0.8126960  | -0.0001380 |
| H  | 5.5135850  | -1.0394290 | 0.0001520  |
| H  | 4.6990320  | -3.2556720 | 0.0010540  |
| H  | 3.1743300  | -3.4748990 | 0.8806110  |
| H  | 3.1742790  | -3.4755170 | -0.8782720 |
| H  | 5.1724920  | 1.4133570  | -0.0008750 |
| C  | 1.9222930  | 0.4074550  | -0.0001070 |
| C  | 4.3237590  | 0.7404430  | -0.0004850 |
| Cl | 0.7552920  | -2.0240520 | 0.0007500  |
| Cl | 2.7825690  | 2.9735850  | -0.0015720 |
| 15 |            |            |            |
| L  |            |            |            |
| C  | 0.5430250  | -1.3696140 | 0.0000000  |
| C  | 0.0000000  | 0.9517030  | 0.0000000  |
| C  | -1.3710010 | 0.6798740  | 0.0000000  |
| C  | -1.7447230 | -0.6669540 | 0.0000000  |
| C  | -2.3965310 | 1.7765240  | 0.0000000  |
| H  | 2.0202670  | 0.2046850  | 0.0000000  |
| H  | -2.8014860 | -0.9128080 | 0.0000000  |
| H  | -3.4028440 | 1.3558970  | 0.0000000  |
| H  | -2.2822230 | 2.4159030  | 0.8788960  |
| H  | -2.2822230 | 2.4159030  | -0.8788960 |
| H  | -1.1183710 | -2.7327620 | 0.0000000  |
| Cl | 0.5420330  | 2.6118140  | 0.0000000  |
| Cl | 1.7358040  | -2.6425720 | 0.0000000  |
| C  | 0.9671910  | -0.0468570 | 0.0000000  |
| C  | -0.8073530 | -1.6953300 | 0.0000000  |

|       |            |            |            |
|-------|------------|------------|------------|
| 30    |            |            |            |
| 23C1A |            |            |            |
| C     | 0.9836380  | -3.9852620 | 0.0000000  |
| C     | 2.3625390  | -4.1782370 | 0.0000000  |
| C     | 0.5428310  | -2.6449040 | 0.0000000  |
| N     | 0.3104440  | -5.1904740 | 0.0000000  |
| N     | 3.3032170  | -3.2213080 | 0.0000000  |
| N     | 2.5219810  | -5.5376820 | 0.0000000  |
| N     | 1.4643540  | -1.6670500 | 0.0000000  |
| N     | -0.7606220 | -2.3197290 | 0.0000000  |
| C     | 1.2673700  | -6.0856370 | 0.0000000  |
| C     | 2.7619340  | -2.0084840 | 0.0000000  |
| H     | 3.3988950  | -6.0413100 | 0.0000000  |
| H     | -1.0390460 | -1.3483970 | 0.0000000  |
| H     | -1.4697330 | -3.0376670 | 0.0000000  |
| H     | 1.1222840  | -7.1558530 | 0.0000000  |
| H     | 3.4589860  | -1.1759860 | 0.0000000  |
| Cl    | 0.0000000  | 1.1064240  | 0.0000000  |
| C     | -1.0519890 | 2.4928480  | 0.0000000  |
| C     | -0.5387520 | 3.7911410  | 0.0000000  |
| C     | -2.4276570 | 2.2892780  | 0.0000000  |
| Cl    | 1.1739950  | 4.0838170  | 0.0000000  |
| C     | -1.4121920 | 4.8731380  | 0.0000000  |
| C     | -3.3144990 | 3.3671830  | 0.0000000  |
| H     | -2.8054570 | 1.2715620  | 0.0000000  |
| C     | -2.7866360 | 4.6593980  | 0.0000000  |
| H     | -1.0073200 | 5.8785720  | 0.0000000  |
| C     | -4.8001580 | 3.1314450  | 0.0000000  |
| H     | -3.4582060 | 5.5112610  | 0.0000000  |
| H     | -5.3399050 | 4.0798150  | 0.0000000  |
| H     | -5.1062980 | 2.5630790  | 0.8818370  |
| H     | -5.1062980 | 2.5630790  | -0.8818370 |

|       |            |            |           |
|-------|------------|------------|-----------|
| 28    |            |            |           |
| 23C1C |            |            |           |
| N     | -0.7469750 | -2.6752580 | 0.0000000 |
| C     | -1.9699760 | -3.2678110 | 0.0000000 |
| N     | -2.0128250 | -4.6651760 | 0.0000000 |
| C     | -0.8992020 | -5.4391730 | 0.0000000 |
| C     | 0.3257730  | -4.8616740 | 0.0000000 |
| C     | 0.3503760  | -3.4251400 | 0.0000000 |
| N     | 1.5323410  | -2.7890280 | 0.0000000 |
| H     | 1.5539510  | -1.7778650 | 0.0000000 |
| H     | 2.4053390  | -3.2934930 | 0.0000000 |
| C     | 0.1852420  | 4.3372070  | 0.0000000 |

|    |            |            |            |
|----|------------|------------|------------|
| C  | -0.3089050 | 3.0374420  | 0.0000000  |
| Cl | -2.0284000 | 2.7851500  | 0.0000000  |
| C  | 0.5818580  | 1.9626810  | 0.0000000  |
| C  | 1.9528600  | 2.1954340  | 0.0000000  |
| C  | 2.4611170  | 3.4962070  | 0.0000000  |
| C  | 1.5581310  | 4.5606560  | 0.0000000  |
| C  | 3.9483670  | 3.7240330  | 0.0000000  |
| H  | 1.9299330  | 5.5799740  | 0.0000000  |
| H  | 4.1808250  | 4.7899660  | 0.0000000  |
| H  | 4.4114440  | 3.2729430  | 0.8812170  |
| H  | 4.4114440  | 3.2729430  | -0.8812170 |
| H  | -0.5119140 | 5.1670990  | 0.0000000  |
| O  | -3.0365780 | -2.6466090 | 0.0000000  |
| H  | 1.2348960  | -5.4451120 | 0.0000000  |
| H  | -1.0560500 | -6.5101660 | 0.0000000  |
| H  | -2.9344440 | -5.0845070 | 0.0000000  |
| H  | 2.6283550  | 1.3456920  | 0.0000000  |
| Cl | 0.0000000  | 0.3232300  | 0.0000000  |

|       |            |            |            |
|-------|------------|------------|------------|
| 31    |            |            |            |
| 23ClG |            |            |            |
| N     | -0.5199880 | 1.7856800  | 0.0000000  |
| C     | 0.1677190  | 2.9754310  | 0.0000000  |
| N     | -0.4173830 | 4.1529990  | 0.0000000  |
| C     | -1.7664640 | 4.0643530  | 0.0000000  |
| C     | -2.5612900 | 2.9243730  | 0.0000000  |
| C     | -1.9218060 | 1.6454020  | 0.0000000  |
| N     | -3.9004510 | 3.2555500  | 0.0000000  |
| C     | -3.9110350 | 4.5621340  | 0.0000000  |
| N     | -2.6478120 | 5.1035150  | 0.0000000  |
| H     | -4.7914470 | 5.1861320  | 0.0000000  |
| C     | 3.2369920  | -3.1676120 | 0.0000000  |
| C     | 2.1852190  | -2.2595930 | 0.0000000  |
| Cl    | 2.5493190  | -0.5556560 | 0.0000000  |
| C     | 0.8689060  | -2.7209400 | 0.0000000  |
| C     | 0.6151200  | -4.0883200 | 0.0000000  |
| C     | 1.6609750  | -5.0134160 | 0.0000000  |
| C     | 2.9720860  | -4.5330990 | 0.0000000  |
| C     | 1.3724020  | -6.4901660 | 0.0000000  |
| H     | 3.7998430  | -5.2345360 | 0.0000000  |
| H     | 2.3011400  | -7.0626290 | 0.0000000  |
| H     | -2.4144000 | 6.0875620  | 0.0000000  |
| H     | 4.2556860  | -2.7978660 | 0.0000000  |
| N     | 1.5118510  | 2.8988360  | 0.0000000  |
| H     | 2.0431090  | 3.7559230  | 0.0000000  |
| H     | 2.0044590  | 2.0201110  | 0.0000000  |
| O     | -2.4277530 | 0.5265970  | 0.0000000  |
| H     | 0.0000000  | 0.9098430  | 0.0000000  |
| H     | -0.4159820 | -4.4279200 | 0.0000000  |
| Cl    | -0.4695080 | -1.6129240 | 0.0000000  |
| H     | 0.7931820  | -6.7754380 | 0.8817990  |
| H     | 0.7931820  | -6.7754380 | -0.8817990 |
| 30    |            |            |            |
| 23ClT |            |            |            |
| N     | -3.4857360 | -2.9652520 | 0.0000000  |
| C     | -2.1334930 | -2.7369710 | 0.0000000  |
| O     | -1.2967940 | -3.6278280 | 0.0000000  |
| N     | -1.8012920 | -1.3991930 | 0.0000000  |
| C     | -2.6714270 | -0.3123750 | 0.0000000  |
| O     | -2.2274690 | 0.8314550  | 0.0000000  |
| C     | -4.0882510 | -0.6522380 | 0.0000000  |
| C     | -4.4223030 | -1.9597480 | 0.0000000  |
| C     | -5.0871480 | 0.4618250  | 0.0000000  |

|      |            |            |            |
|------|------------|------------|------------|
| H    | -0.8025120 | -1.2003160 | 0.0000000  |
| H    | -5.4529970 | -2.2914790 | 0.0000000  |
| H    | -6.1029860 | 0.0629440  | 0.0000000  |
| H    | -4.9574920 | 1.0963610  | 0.8797280  |
| H    | -4.9574920 | 1.0963610  | -0.8797280 |
| H    | -3.7778380 | -3.9339020 | 0.0000000  |
| C    | 3.3965160  | 0.9659480  | 0.0000000  |
| C    | 1.0319880  | 1.4692970  | 0.0000000  |
| C    | 1.3028840  | 2.8363060  | 0.0000000  |
| C    | 2.6382700  | 3.2542150  | 0.0000000  |
| C    | 0.1770310  | 3.8343140  | 0.0000000  |
| H    | 2.8707290  | 4.3140930  | 0.0000000  |
| H    | 0.2313420  | 4.4786050  | 0.8808220  |
| H    | 0.2313420  | 4.4786050  | -0.8808220 |
| H    | -0.7898440 | 3.3255900  | 0.0000000  |
| H    | 4.7095400  | 2.6553850  | 0.0000000  |
| C    | 2.0705290  | 0.5418130  | 0.0000000  |
| C    | 3.6753770  | 2.3315040  | 0.0000000  |
| Cl   | 4.7132400  | -0.1670630 | 0.0000000  |
| Cl   | 1.6786220  | -1.1558100 | 0.0000000  |
| H    | 0.0000000  | 1.1253500  | 0.0000000  |
| 15   |            |            |            |
| 23Cl |            |            |            |
| C    | 0.8364920  | -0.4452570 | 0.0000000  |
| C    | -1.3811480 | 0.5118510  | 0.0000000  |
| C    | -1.9548510 | -0.7615770 | 0.0000000  |
| C    | -1.1066190 | -1.8702870 | 0.0000000  |
| C    | -3.4524450 | -0.9147200 | 0.0000000  |
| H    | -1.5285260 | -2.8700040 | 0.0000000  |
| H    | -3.7371490 | -1.9678150 | 0.0000000  |
| H    | -3.8912820 | -0.4394880 | 0.8808970  |
| H    | -3.8912820 | -0.4394880 | -0.8808970 |
| H    | 0.9286730  | -2.5830330 | 0.0000000  |
| Cl   | 2.5654490  | -0.2763060 | 0.0000000  |
| C    | 0.0000000  | 0.6721070  | 0.0000000  |
| C    | 0.2762510  | -1.7179060 | 0.0000000  |
| Cl   | 0.6595150  | 2.2797750  | 0.0000000  |
| H    | -2.0108890 | 1.3955940  | 0.0000000  |
